# Supplementary material for: N-doped porous carbons derived from Zn-porphyrin-MOF
Source: Royal Society of Chemistry journal article supplement (doi:10.1039/d2ra00327a), 2022-01-01
Supplement: d2ra00327a1.pdf [file d2ra00327a1.pdf]

Supporting Information

## ***N-doped porous carbons derived from Zn-porphyrin-MOF***

**Hyun-Chul Kim,<sup>a</sup> Jongho Yoon,<sup>b</sup> Sukbin Yoon,<sup>a</sup> Youngmee Kim,<sup>\*c</sup> Suk Joong Lee<sup>\*b</sup> and  
Seong Huh<sup>\*a</sup>**

*<sup>a</sup>Department of Chemistry and Protein Research Center for Bio-Industry, Hankuk University of Foreign Studies, Yongin 17035, Republic of Korea. E-mail: shuh@hufs.ac.kr*

*<sup>b</sup>Department of Chemistry, Research Institute for Natural Science, Korea University, Seoul 136-701, Republic of Korea, E-mail: slee1@korea.ac.kr*

*<sup>c</sup>Department of Chemistry and Nano Science, Ewha Womans University, Seoul 120-750, Republic of Korea, E-mail: ymeekim@ewha.ac.kr*

## Calculation of specific capacitance, specific energy, and specific power

### 1. Three-electrode (3E) system

#### (a) Cyclic voltammetry (CV)

The specific capacitance can be calculated from the following equation [1].

$$C_S = \frac{I_a + |I_c|}{2 m (dv/dt)}$$

$C_S$ : specific capacitance (F g<sup>-1</sup>)

$I_a$ : anodic voltammetric current (A)

$I_c$ : cathodic voltammetric current (A)

2: average factor

$m$ : mass of the active material (g)

$dv/dt$ : potential scan rate (V s<sup>-1</sup>)

#### (b) Chronopotentiometry (Galvanostatic charge/discharge, GCD)

The specific capacitance can be estimated by the following equation [2].

$$C_S = \frac{2 \times I}{m \times (\Delta V)^2} \int V(t) dt$$

$I$ : discharging current (A)

$V$ : potential (V)

$m$ : mass of the active material (g)

$\Delta V$ : actual potential window during the discharging (V).

The value of  $\Delta V$  can be obtained from the following equation [3].

$$\Delta V = V_{appl} - IR = V_{appl} - I \times ESR$$

$V_{appl}$ : applied potential window during the discharging (V)

$IR$ : potential drop (V)

*ESR*: equivalent series resistance ( $\Omega$ )

Assuming that the shape of the GCD curve is ideally triangular ( $ESR = 0$ ,  $\int V(t)dt = \Delta V \times \Delta t/2$ ), the specific capacitance can be replaced by *EDLC* [2a,2c].

$$EDLC = \frac{I \times \Delta t}{m \times V_{appl}}$$

$\Delta t$ : discharging time (s)

*EDLC*: electric double layer capacitance ( $F g^{-1}$ )

The specific energy ( $E$ ) and specific power ( $P$ ) can be evaluated by using the given equations [2b,4].

$$E = \frac{1000 \times C_S \times (\Delta V)_2}{3600 \times 2}$$

$$P = \frac{3600 \times E}{\Delta t}$$

$E$ : specific energy ( $Wh kg^{-1}$ )

$P$ : specific power ( $W kg^{-1}$ )

### (c) Electrochemical impedance spectroscopy (EIS)

Using the following equation, frequency dependent specific capacitance can be derived from impedance values [2a,5].

$$C_S = \frac{-Z''}{2\pi f |Z|^2 \times m} = \frac{|Z''|}{2\pi f |(Z')^2 + (Z'')^2| \times m}$$

$f$ : applied frequency (Hz)

$Z$ : total impedance

$Z'$ : real impedance

$Z''$ : imaginary impedance

## 2. 2E system

The specific capacitance of single electrode ( $C_S$ ) can be acquired from the specific capacitance of 2E supercapacitor cell ( $C_T$ ) [6].

$$C_S = 4 \times C_T$$

By substituting  $m$  with  $M$  (total mass of the active materials), the value of  $C_T$  can be gained from the above equations described in 3E system. Thus, the specific energy ( $E$ , Wh kg<sup>-1</sup>) and specific power ( $P$ , W kg<sup>-1</sup>) for 2E cell can also be applied to the following equations in the same manner.

$$E = \frac{1000 \times C_T \times (\Delta V)_2}{3600 \times 2} = \frac{1000 \times C_S \times (\Delta V)_2}{3600 \times 8}$$

$$P = \frac{3600 \times E}{\Delta t}$$

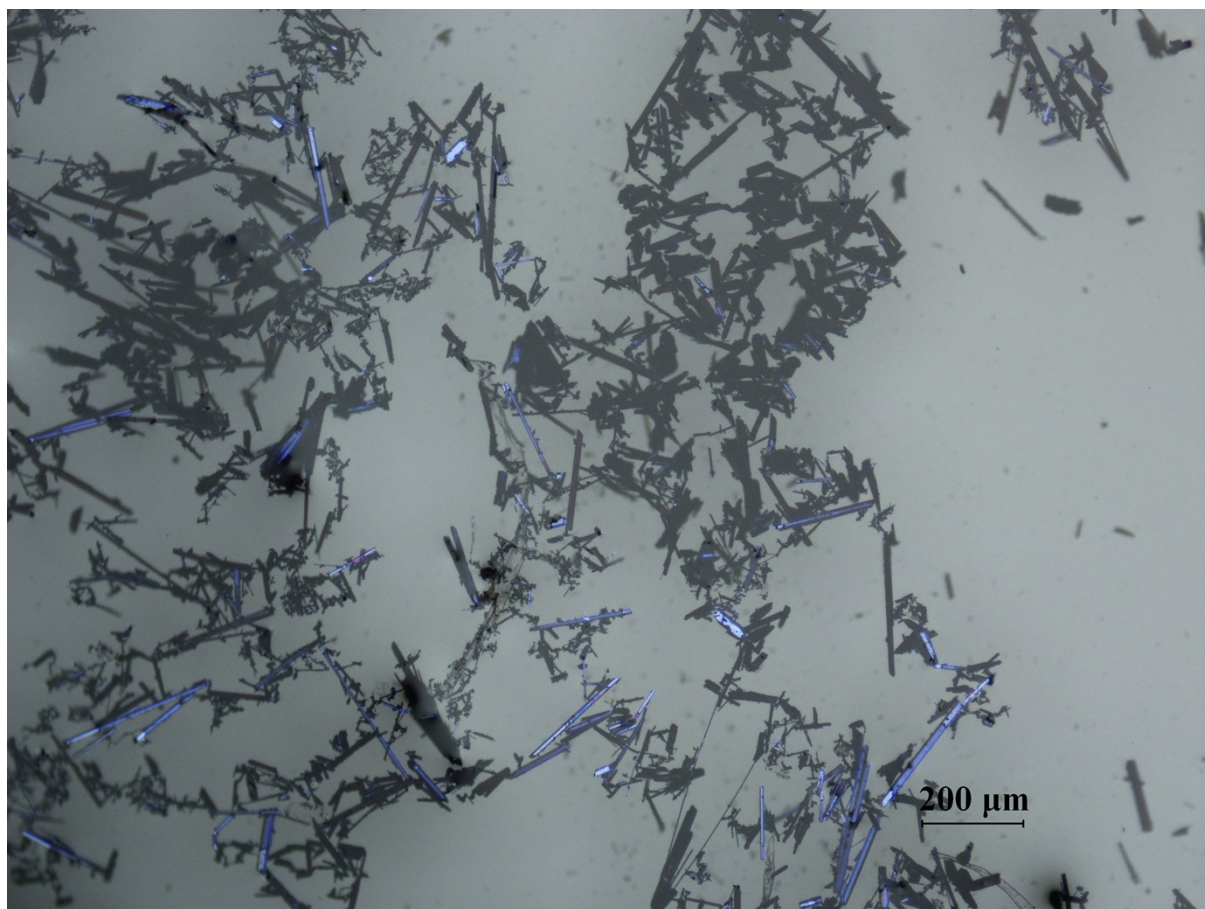

**Figure S1.** Optical microscopic image of the as-prepared Zn-DpyDtolP-MOF.

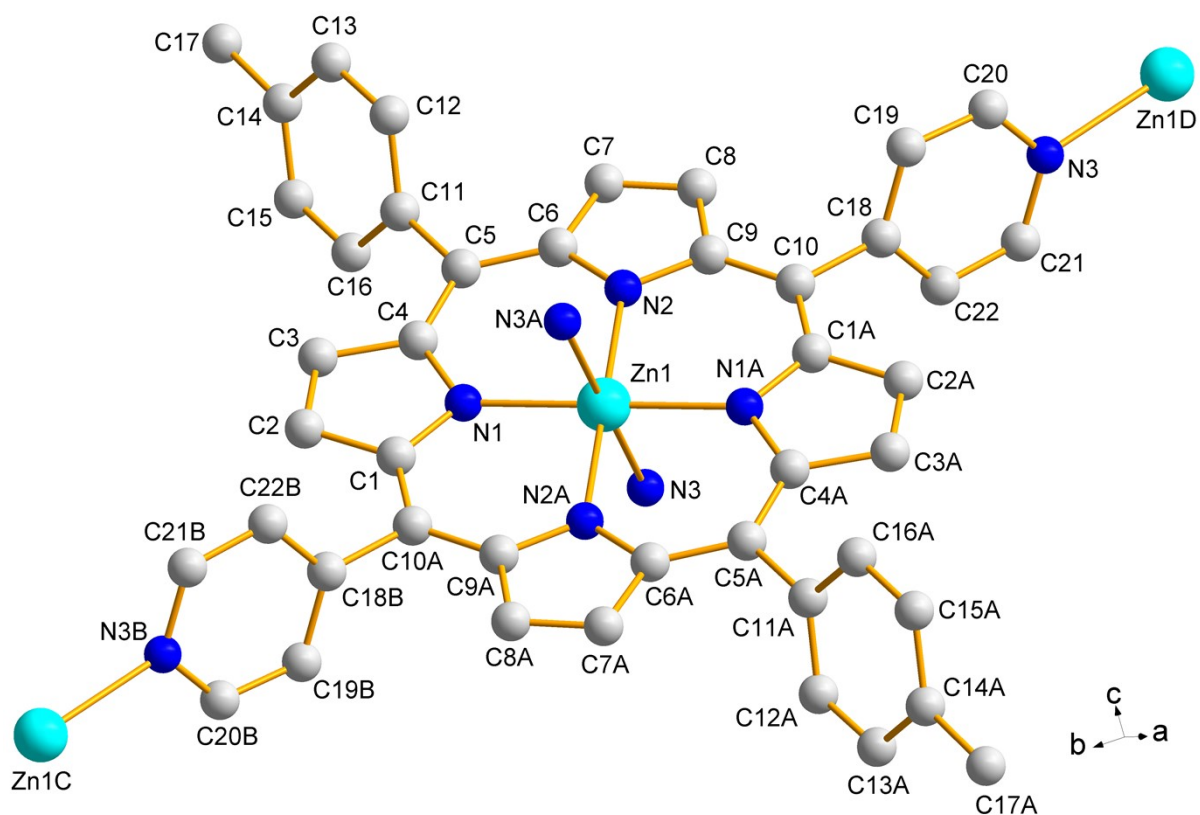

**Figure S2.** The atom numbering scheme of the asymmetric unit of Zn-DpyDtolP-MOF. All hydrogen atoms are removed for clarity. The DMF hemisolvate could not be refined due to disordering. Symmetry codes: A  $1 - x, -y, -z$ ; B  $1/3 + y, 2/3 - x + y, -1/3 - z$ ; C  $1/3 - y, -1/3 + x - y, -1/3 + z$ ; D  $2/3 - y, -2/3 + x - y, 1/3 + z$ .

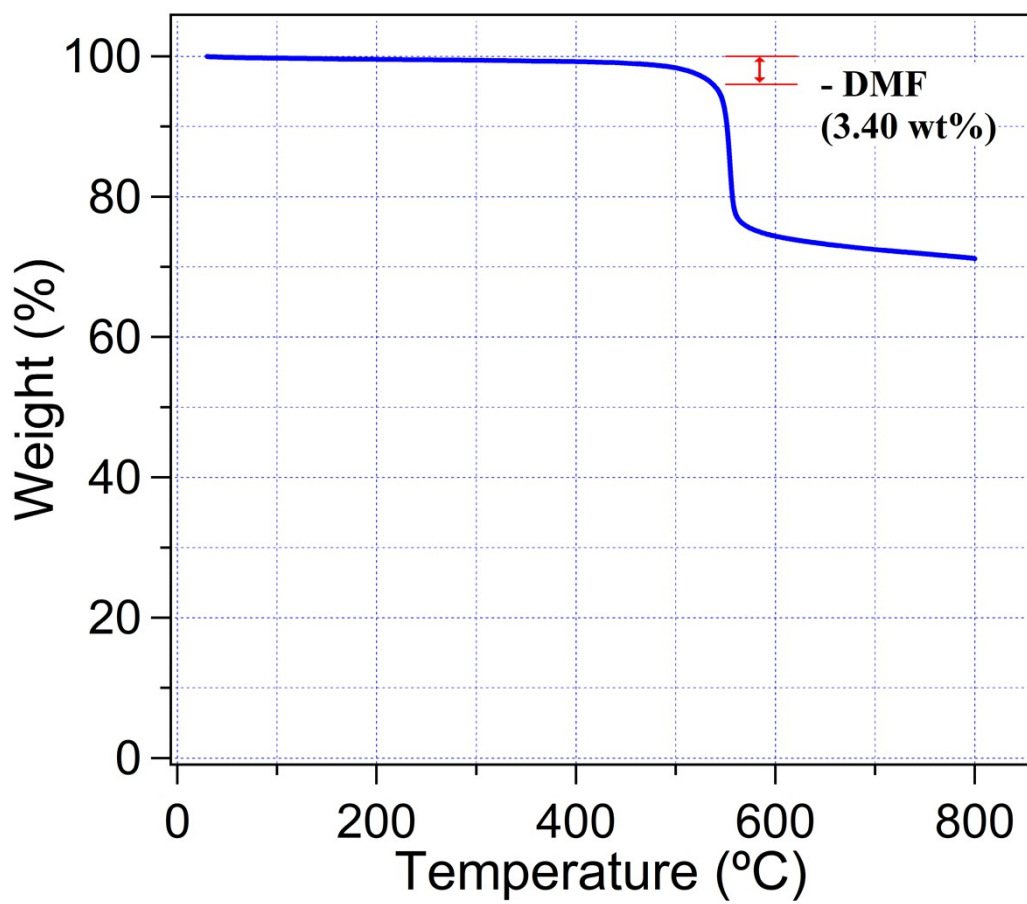

**Figure S3.** Thermogravimetric analysis curve of the as-prepared Zn-DpyDtolP-MOF.

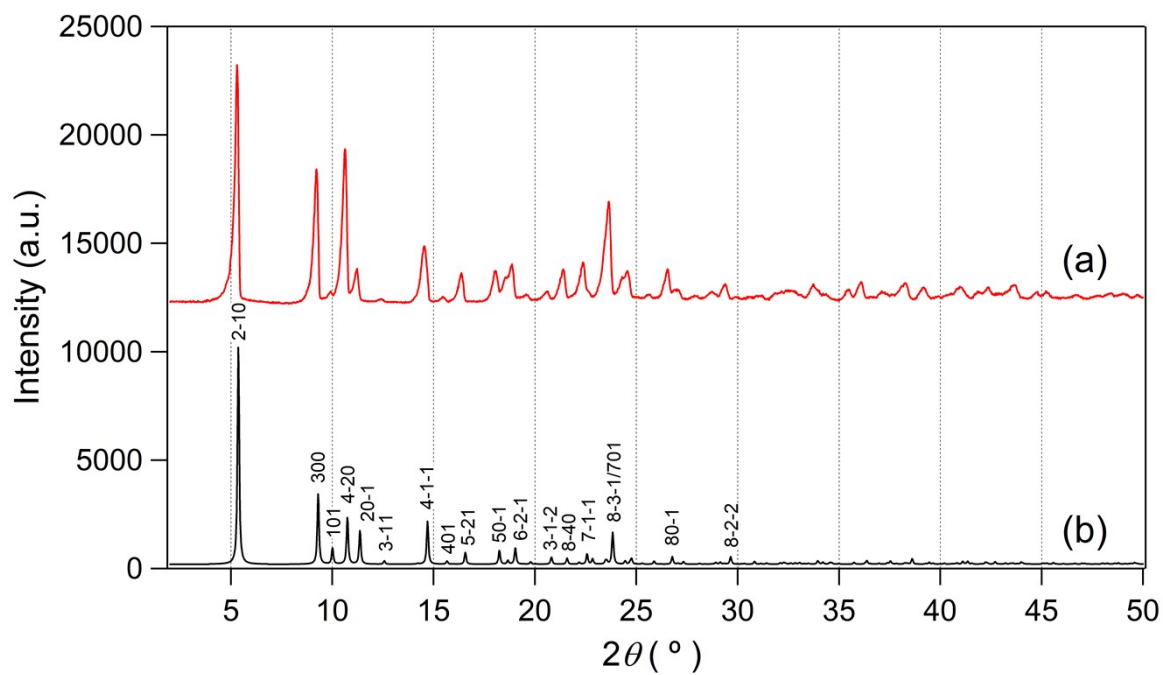

**Figure S4.** The PXRD pattern of the as-prepared Zn-DpyDtolP-MOF (a) and the simulated pattern from X-ray crystallography data (b).



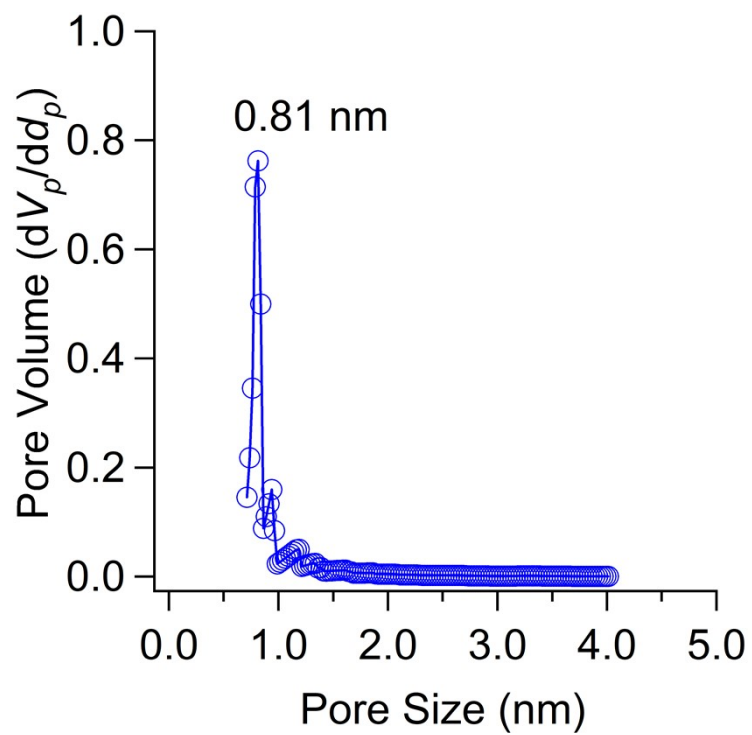

**Figure S5.** The pore size distribution curve of Zn-DpyDtolP-MOF calculated by Horváth-Kawazoe (HK) method.

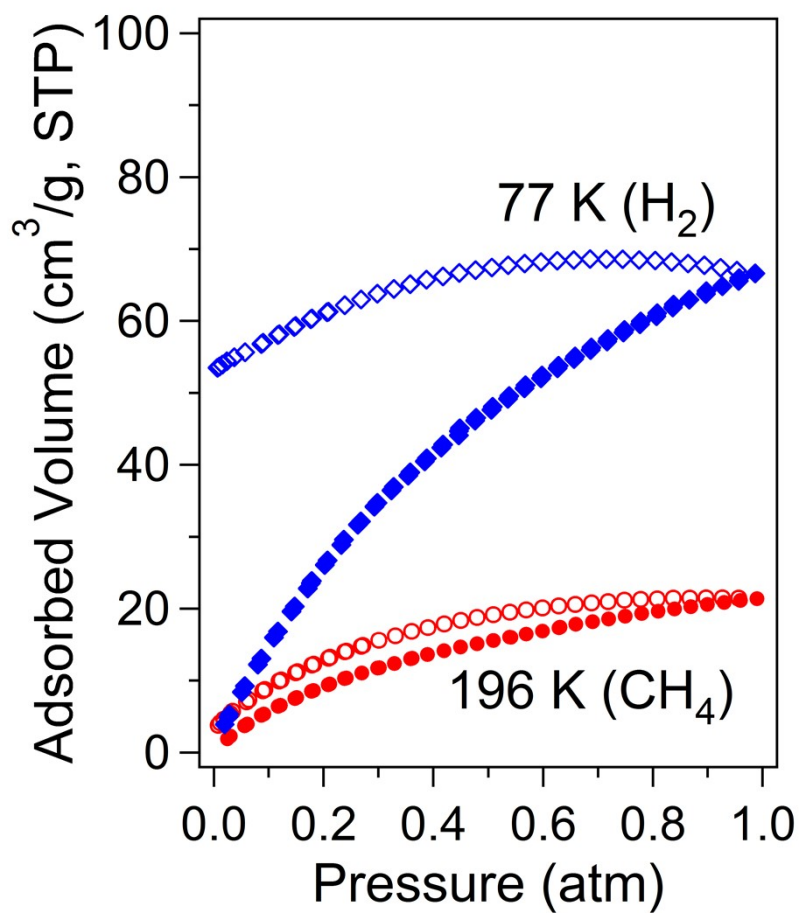

**Figure S6.** H<sub>2</sub> adsorption/desorption isotherms measured at 77 K and CH<sub>4</sub> adsorption/desorption isotherms at 196 K for solvent-free Zn-DpyDtolP-MOF. Open and solid symbols represent adsorption and desorption isotherms, respectively.

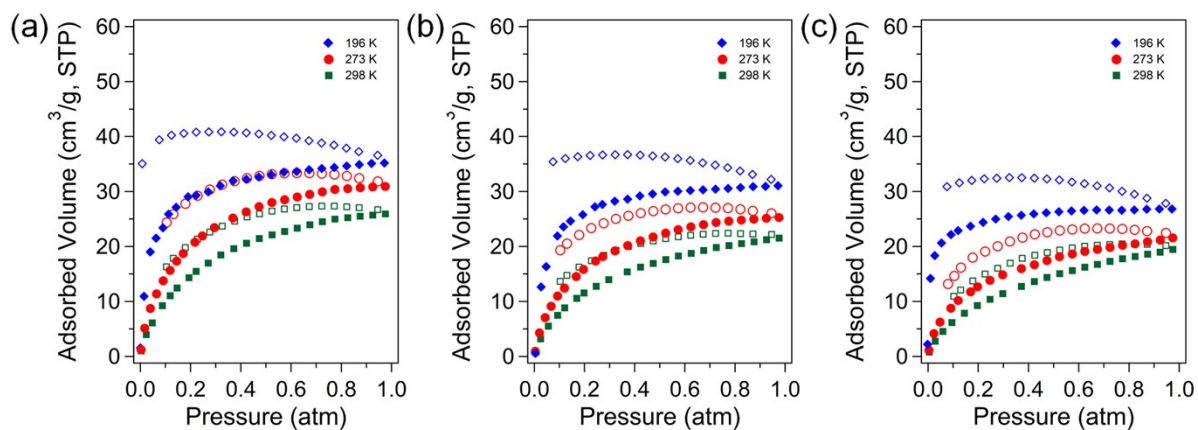

**Figure S7.** CO<sub>2</sub> adsorption/desorption isotherms measured at 196, 273, and 298 K for MDC-700 (a), MDC-800 (b), and MDC-900 (c). Open and solid symbols represent adsorption and desorption isotherms, respectively.

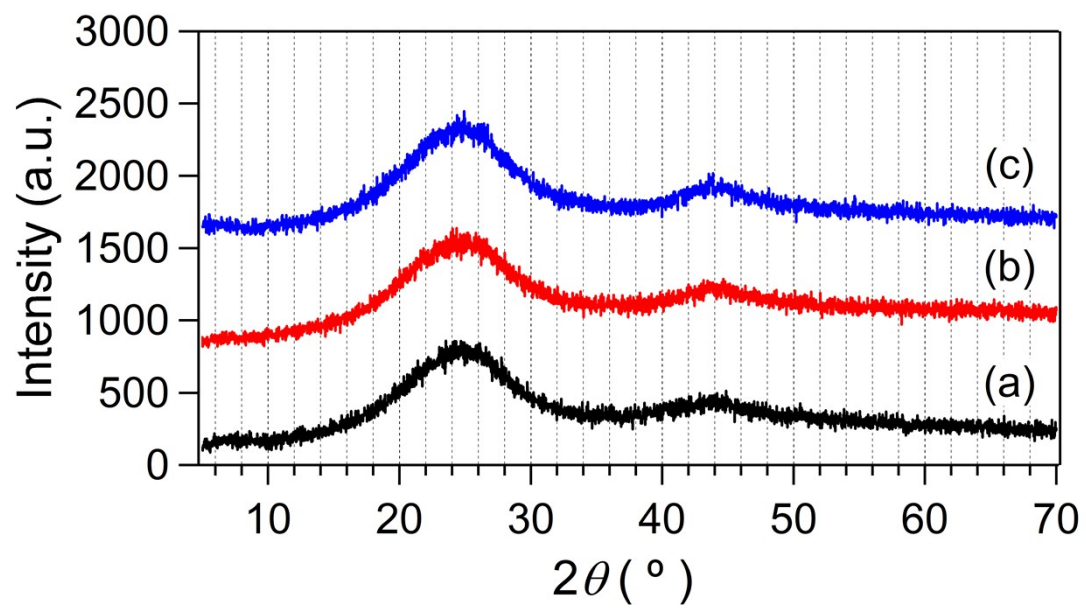

**Figure S8.** PXRD patterns of MDC-700 (a), MDC-800 (b), and MDC-900 (c).

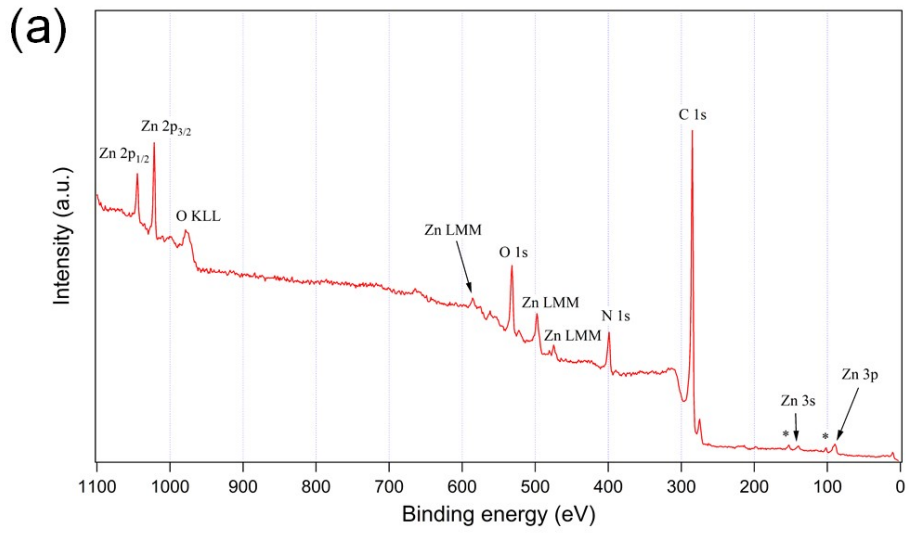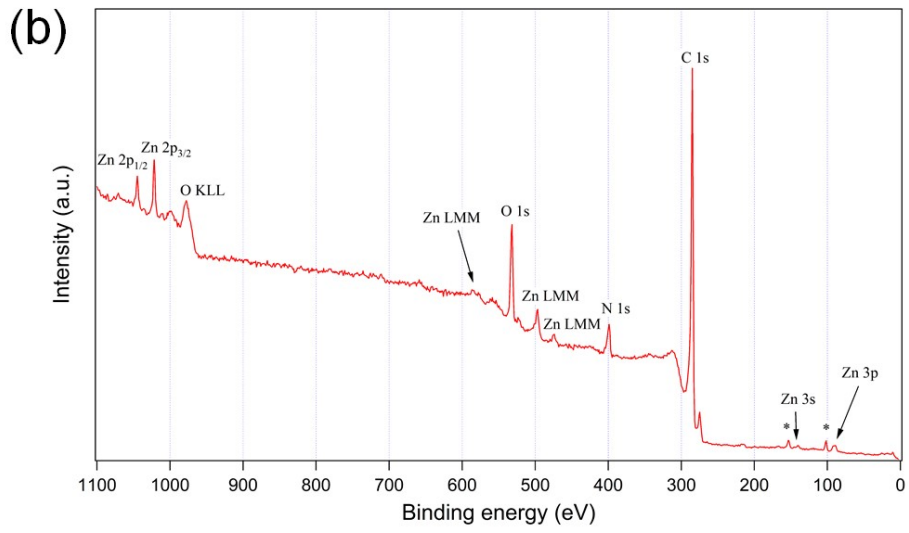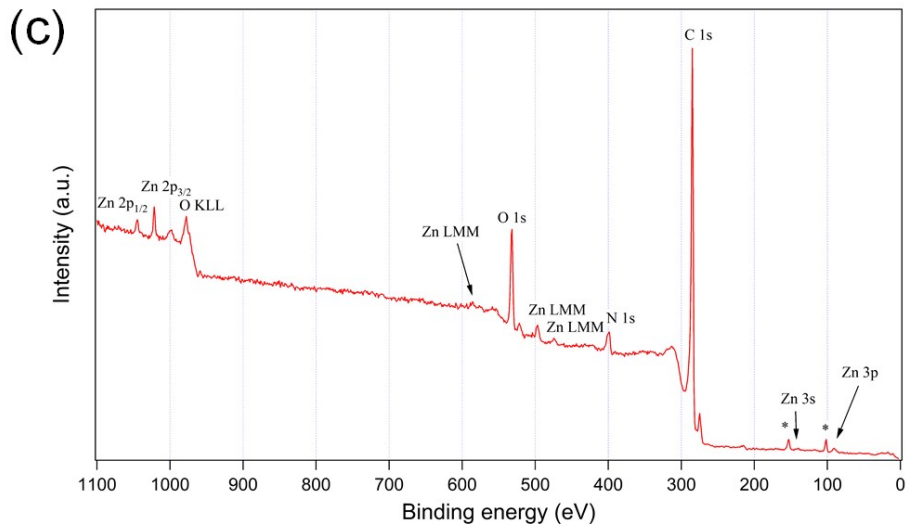

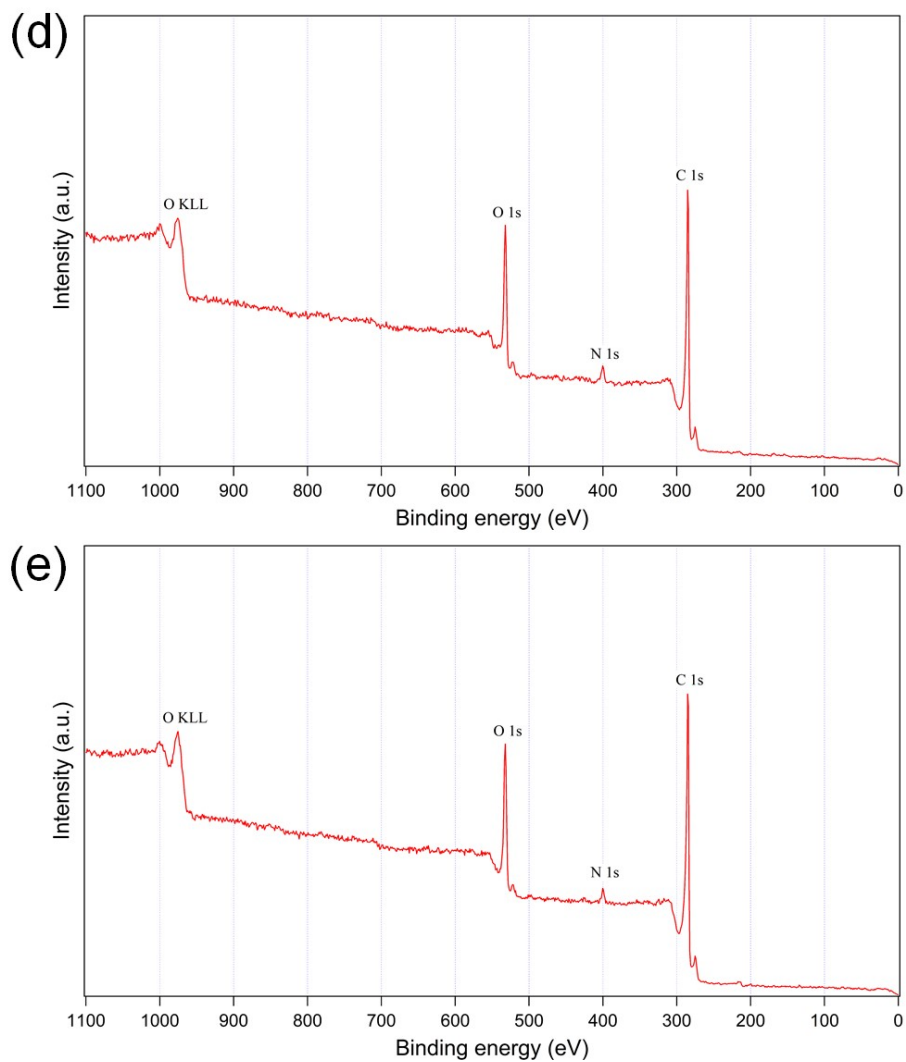

**Figure S9.** Survey XPS spectra of MDC-700 (a), MDC-800 (b), MDC-900 (c), MDC-700-1KOH (d), and MDC-700-2KOH (e).

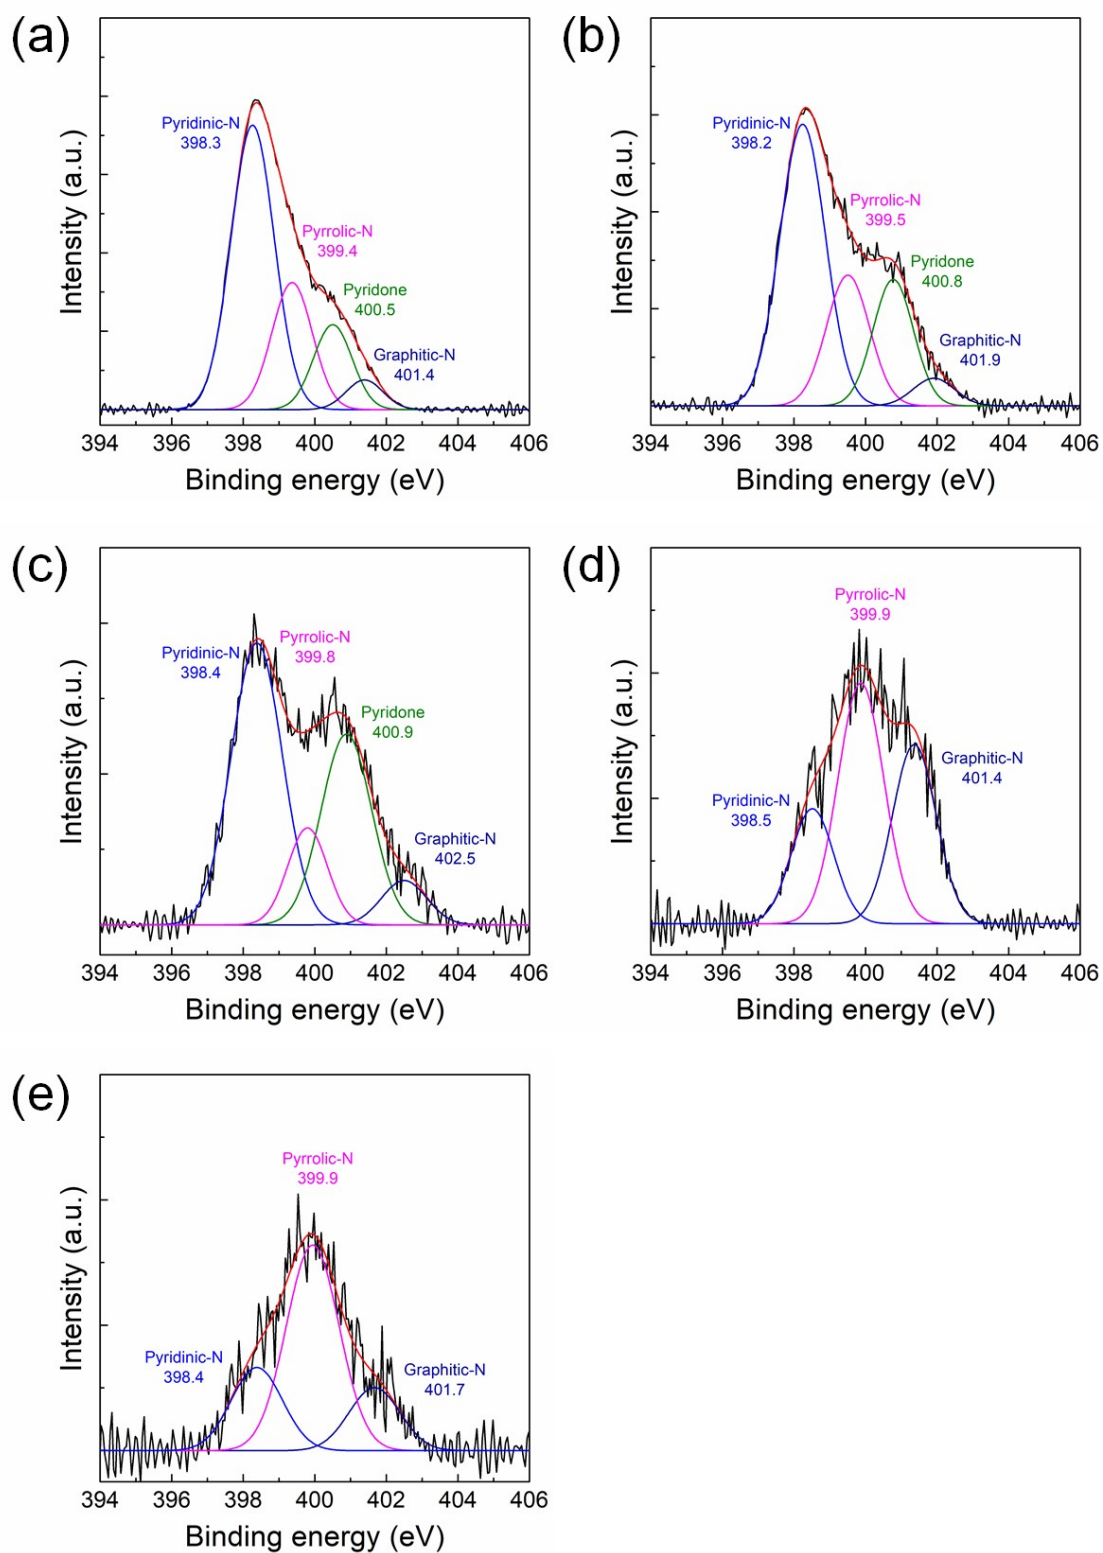

**Figure S10.** Deconvoluted high-resolution N1s XPS spectra of MDC-700 (a), MDC-800 (b), MDC-900 (c), MDC-700-1KOH (d), and MDC-700-2KOH (e).

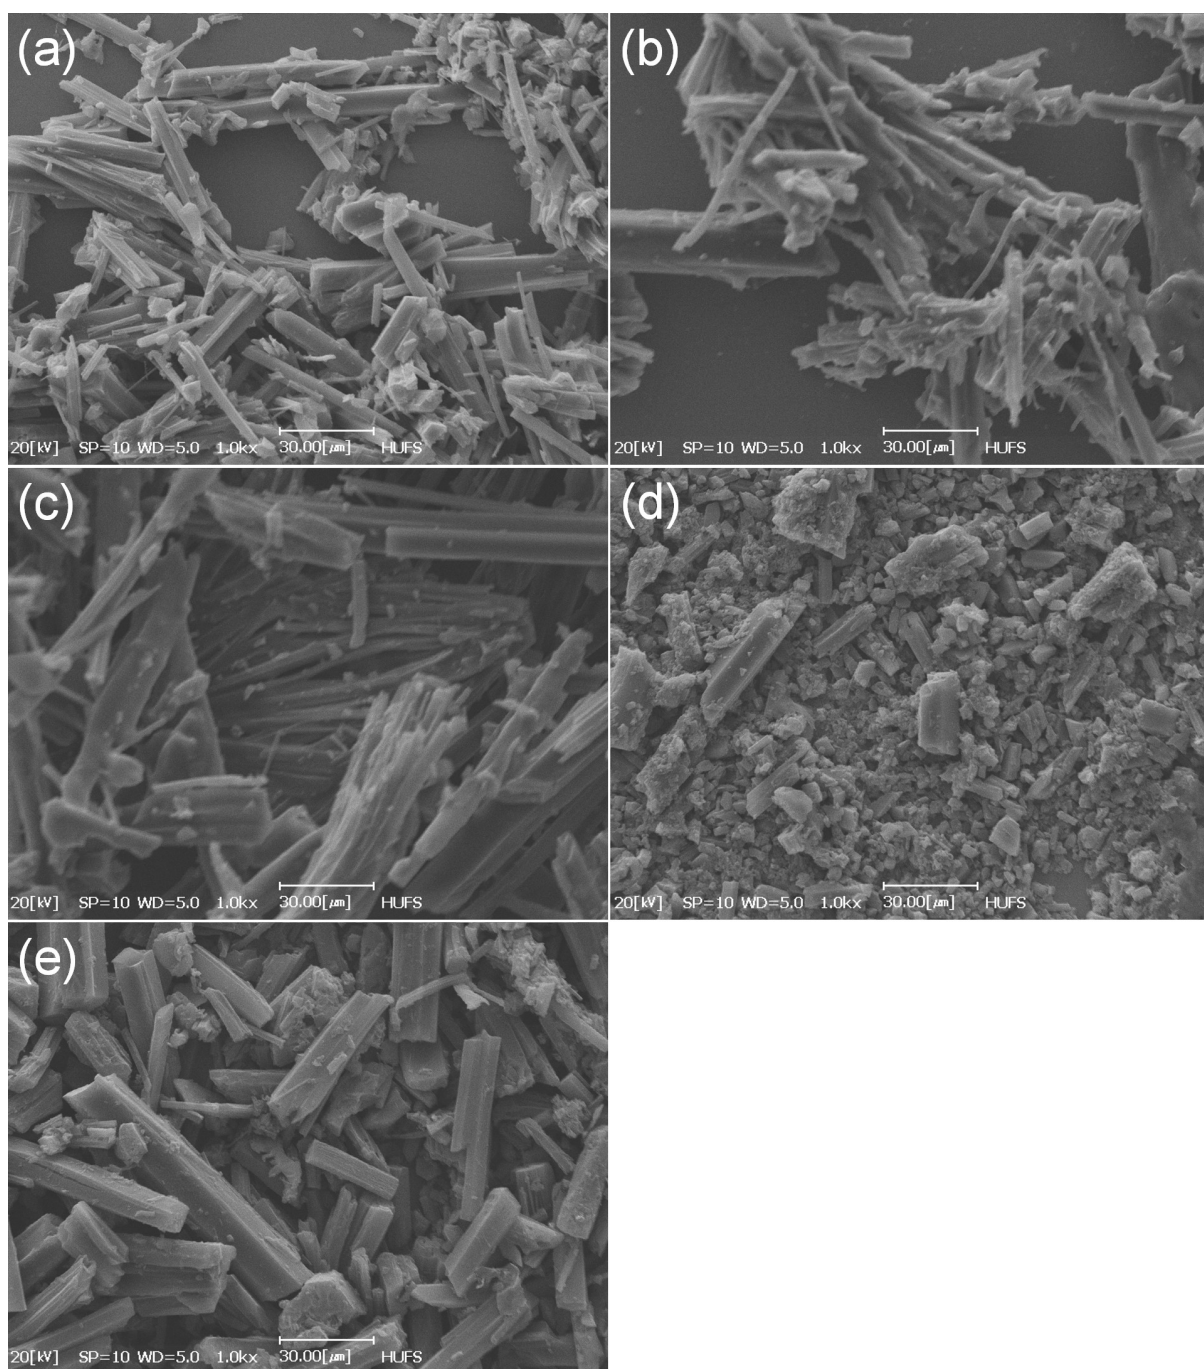

**Figure S11.** SEM images of MDC-700 (a), MDC-800 (b), MDC-900 (c), MDC-700-1KOH (d), and MDC-700-2KOH (e).



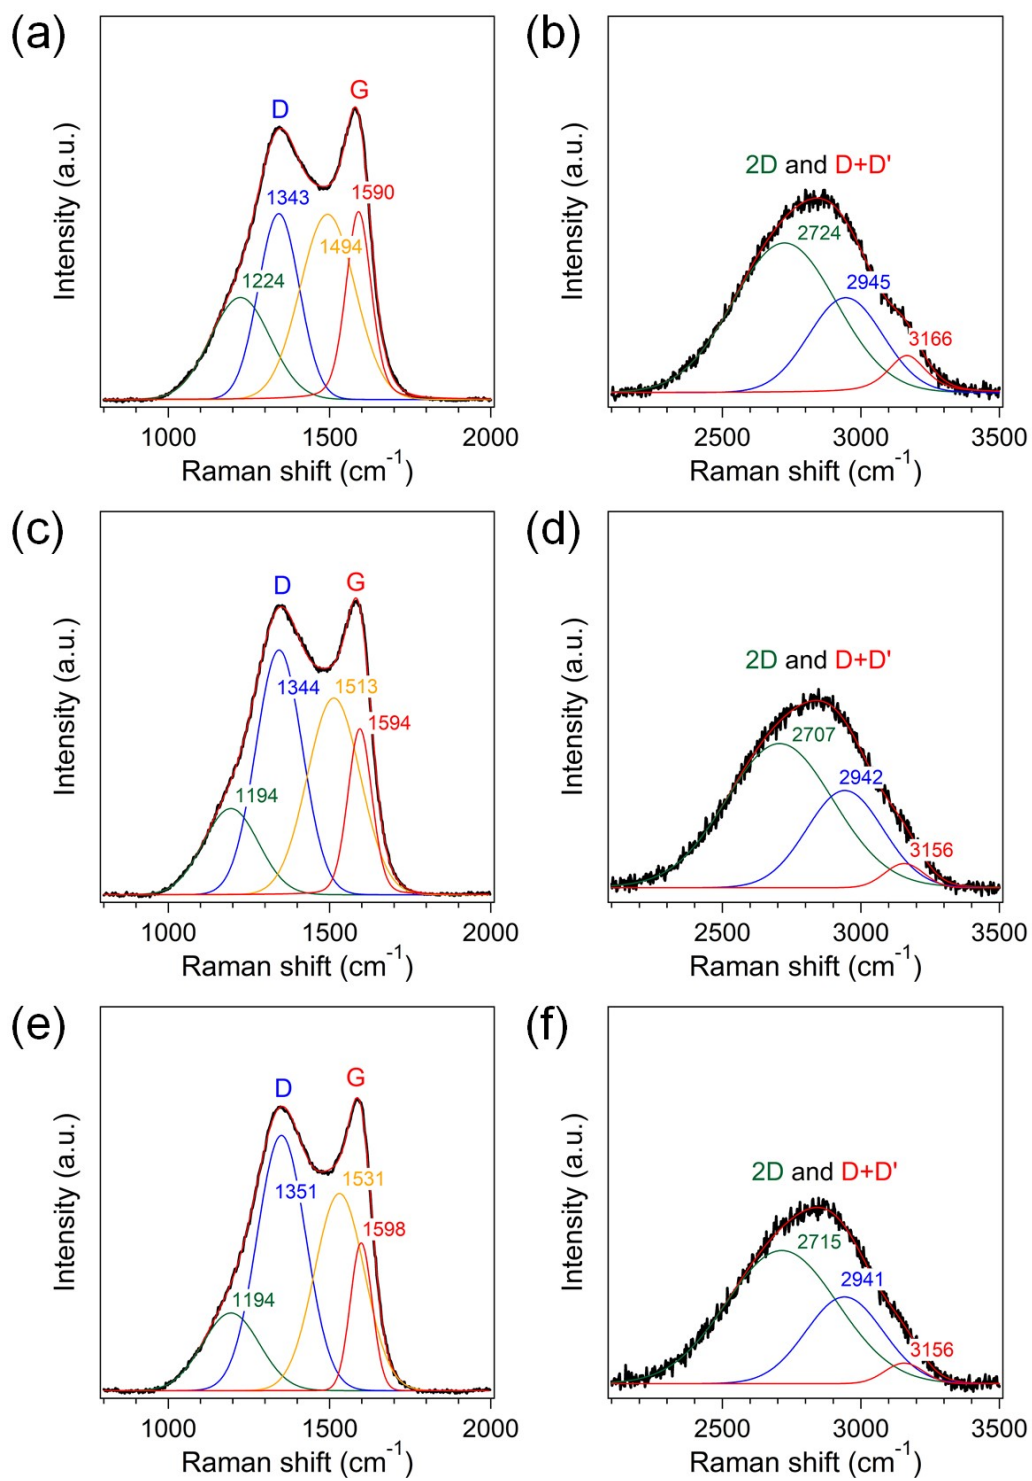

**Figure S12.** Raman spectra for MDC-700 (a, b), MDC-800 (c, d), and MDC-900 (e, f).

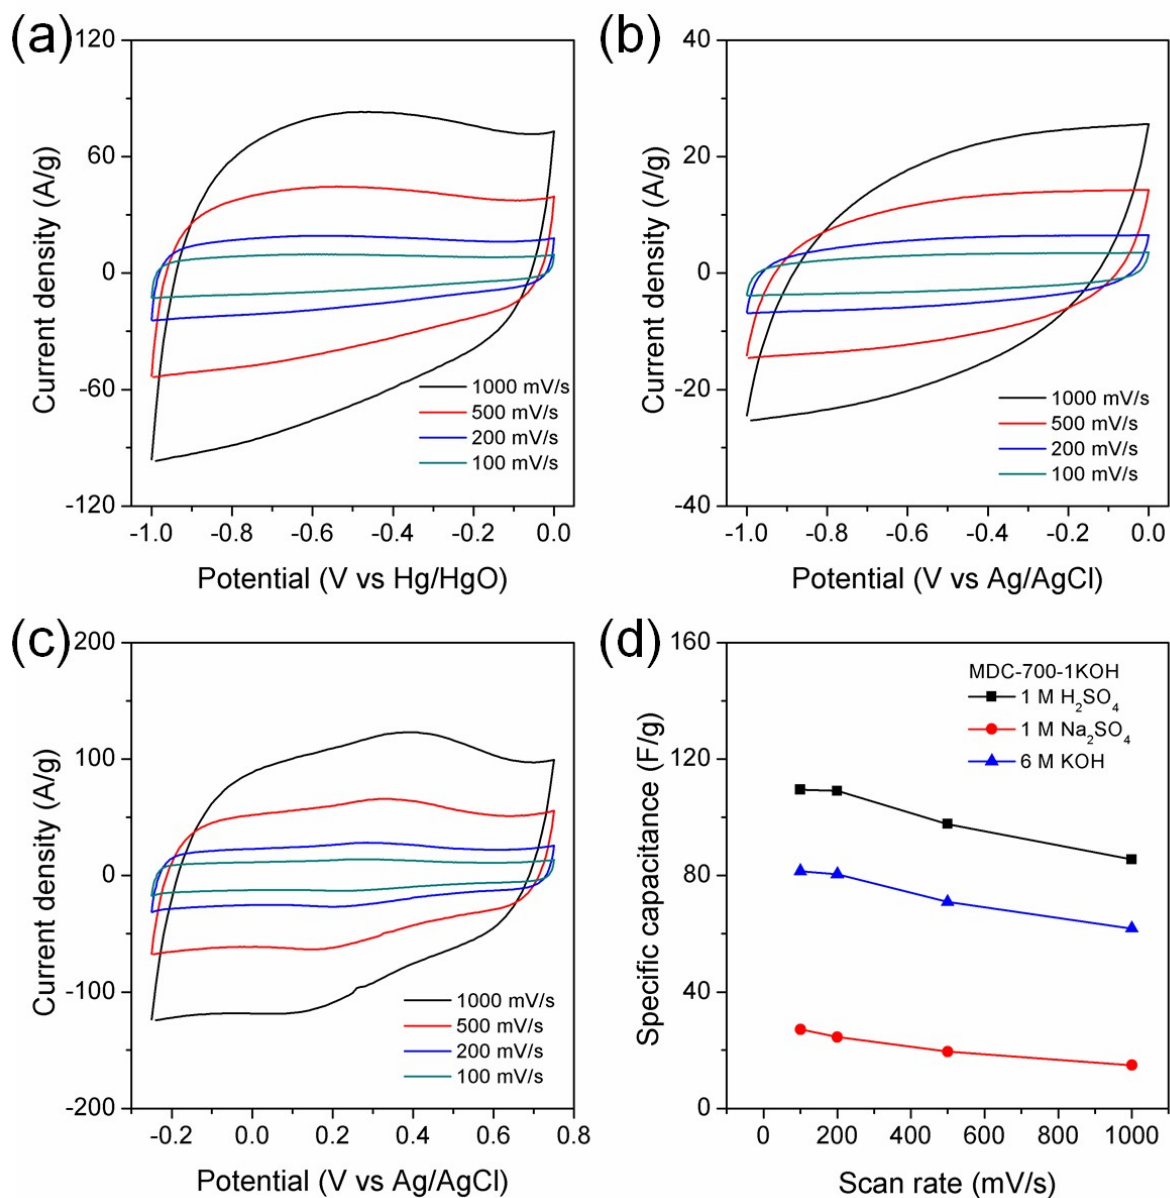

**Figure S13.** CV curves of MDC-700-1KOH using 3E system in 6 M KOH (a), 1 M Na<sub>2</sub>SO<sub>4</sub> (b), and 1 M H<sub>2</sub>SO<sub>4</sub> (c). (d) Dependence of specific capacitance on scan rate (potential window: -1.0 V ~ 0.0 V vs Hg/HgO in 6 M KOH, -1.0 V ~ 0.0 V vs Ag/AgCl in 1 M Na<sub>2</sub>SO<sub>4</sub>, -0.25 V ~ 0.75 V vs Ag/AgCl in 1 M H<sub>2</sub>SO<sub>4</sub>).

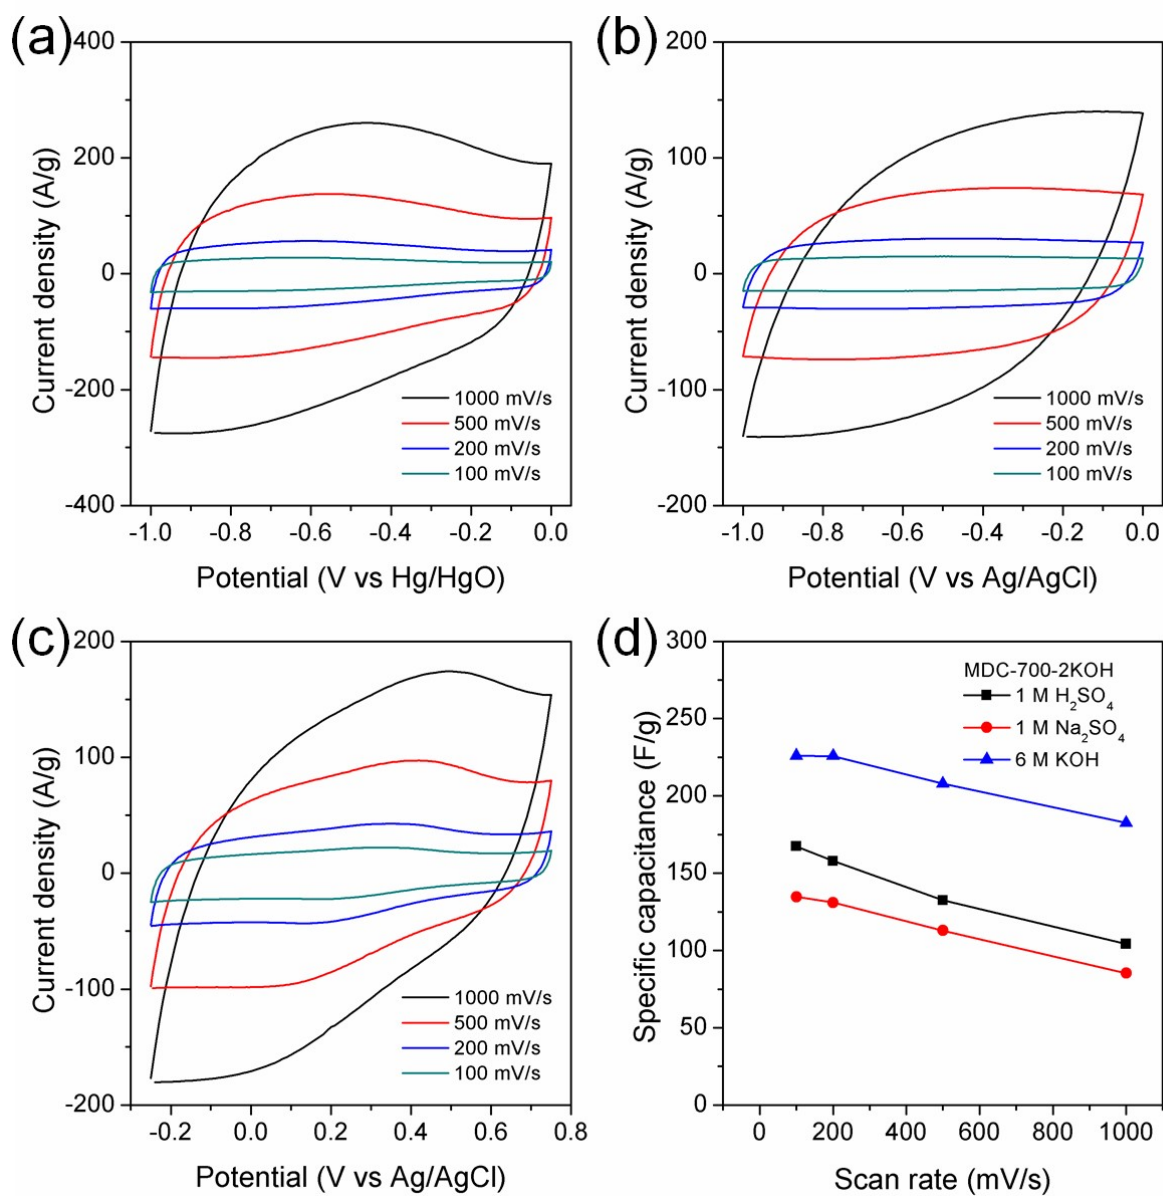

**Figure S14.** CV curves of MDC-700-2KOH using 3E system in 6 M KOH (a), 1 M Na<sub>2</sub>SO<sub>4</sub> (b), and 1 M H<sub>2</sub>SO<sub>4</sub> (c). (d) Dependence of specific capacitance on scan rate (potential window: -1.0 V ~ 0.0 V vs Hg/HgO in 6 M KOH, -1.0 V ~ 0.0 V vs Ag/AgCl for 1 M Na<sub>2</sub>SO<sub>4</sub>, -0.25 V ~ 0.75 V vs Ag/AgCl for 1 M H<sub>2</sub>SO<sub>4</sub>).

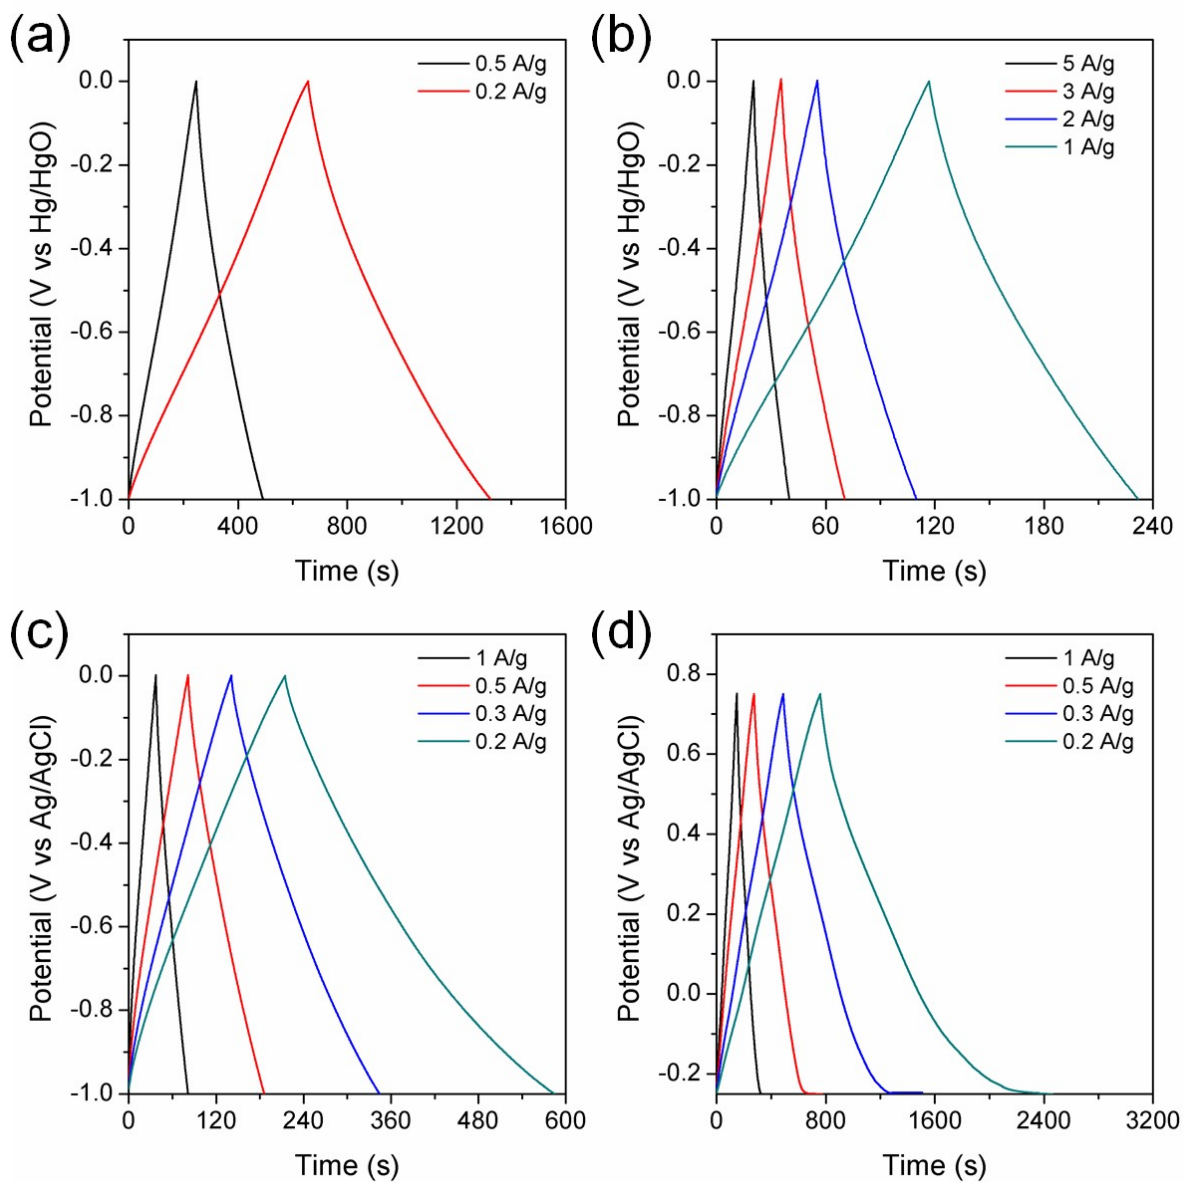

**Figure S15.** GCD curves for MDC-700-1KOH using 3E system in 6 M KOH (a and b), 1 M Na<sub>2</sub>SO<sub>4</sub> (c), and 1 M H<sub>2</sub>SO<sub>4</sub> (d).

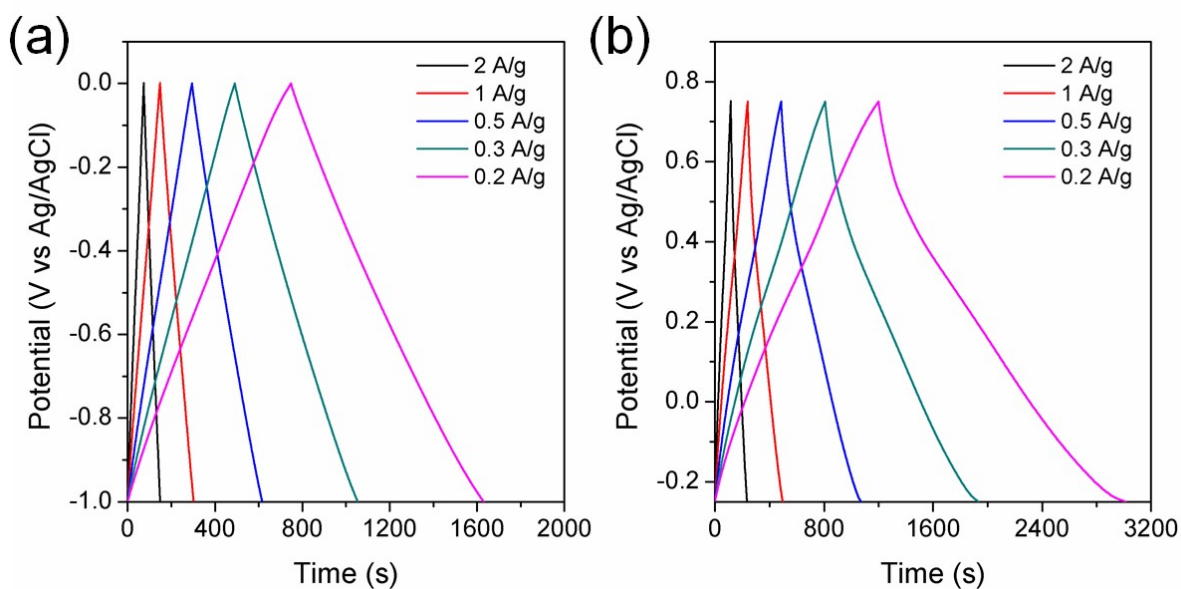

**Figure S16.** GCD curves for MDC-700-2KOH using 3E system in 1 M Na<sub>2</sub>SO<sub>4</sub> (a) and 1 M H<sub>2</sub>SO<sub>4</sub> (b).

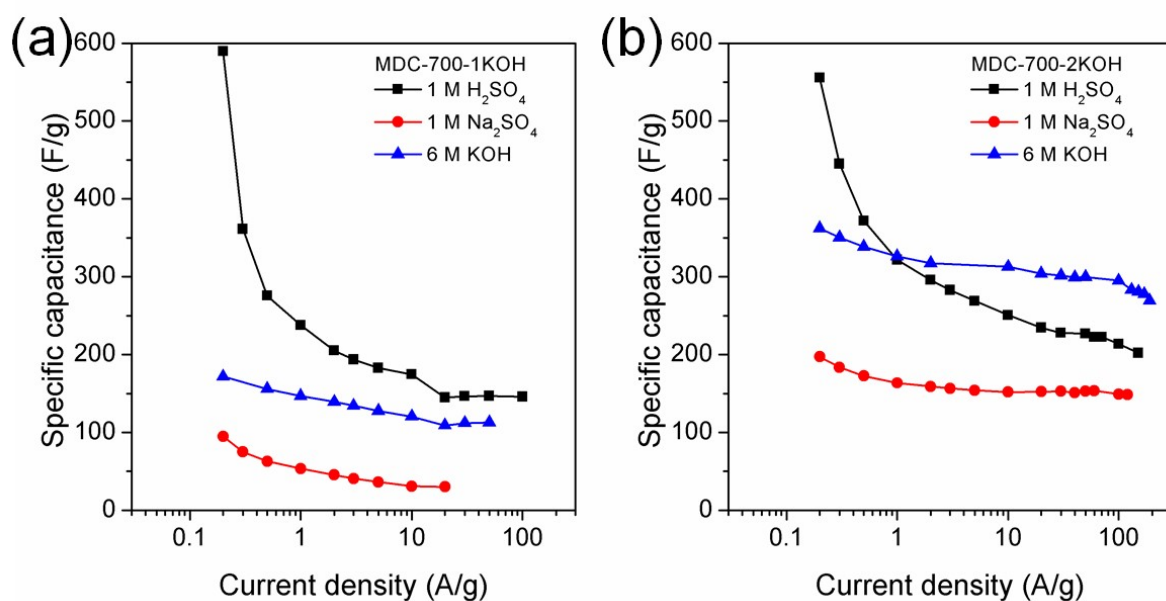

**Figure S17.** Dependence of specific capacitance on current density using 3E system in different electrolytes for MDC-700-1KOH (a) and for MDC-700-2KOH (b).

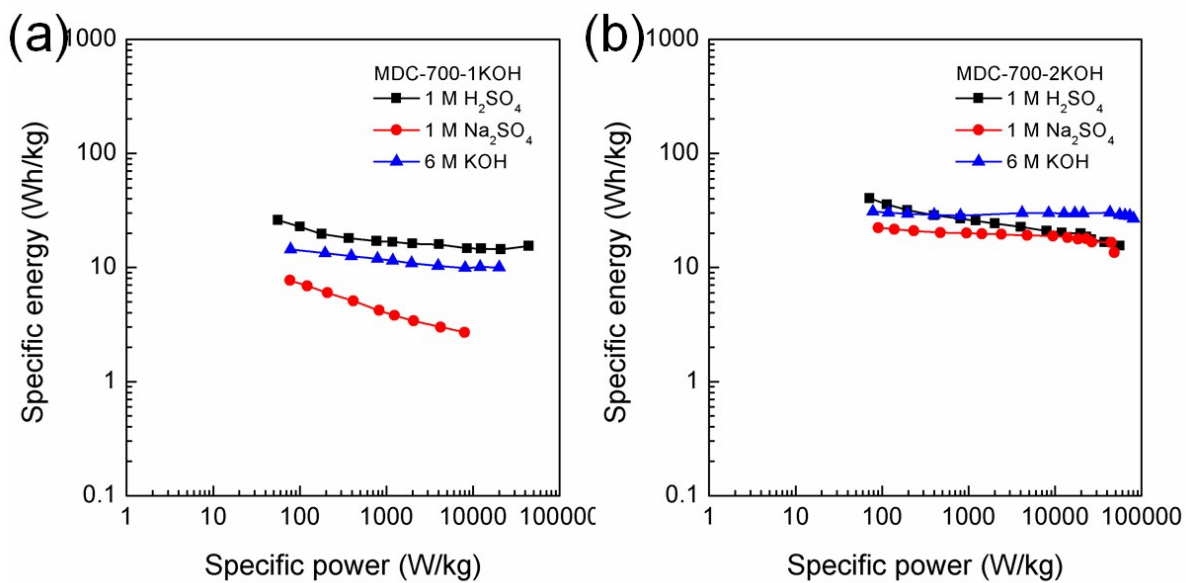

**Figure S18.** Ragone plots from the GCD curves using 3E system in different electrolytes for MDC-700-1KOH (a) and MDC-700-2KOH (b).

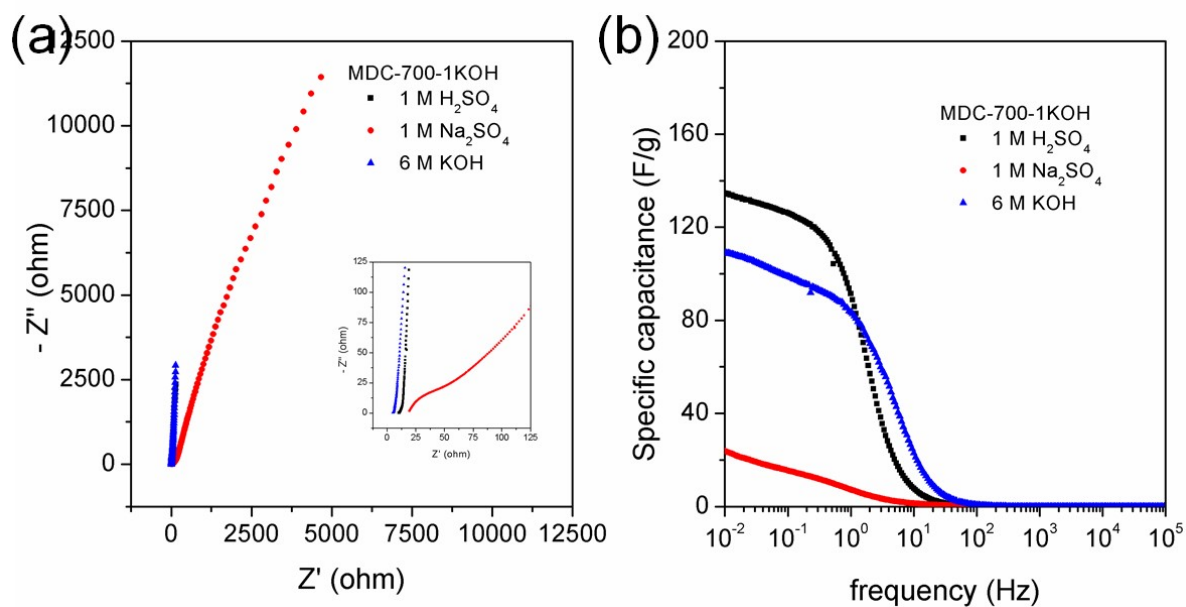

**Figure S19.** EIS plots for MDC-700-1KOH using 3E system in different electrolytes. Nyquist plots (a). Bode plots from the specific capacitance (b).

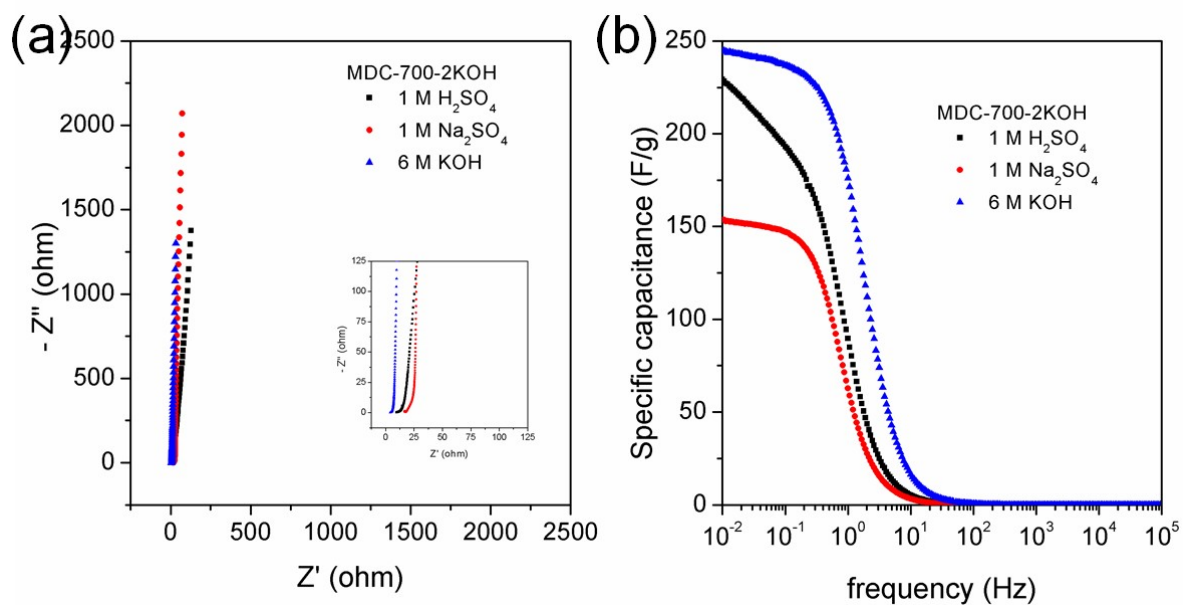

**Figure S20.** EIS plots for MDC-700-2KOH using 3E system in different electrolytes. Nyquist plots (a). Bode plots from the specific capacitance (b).

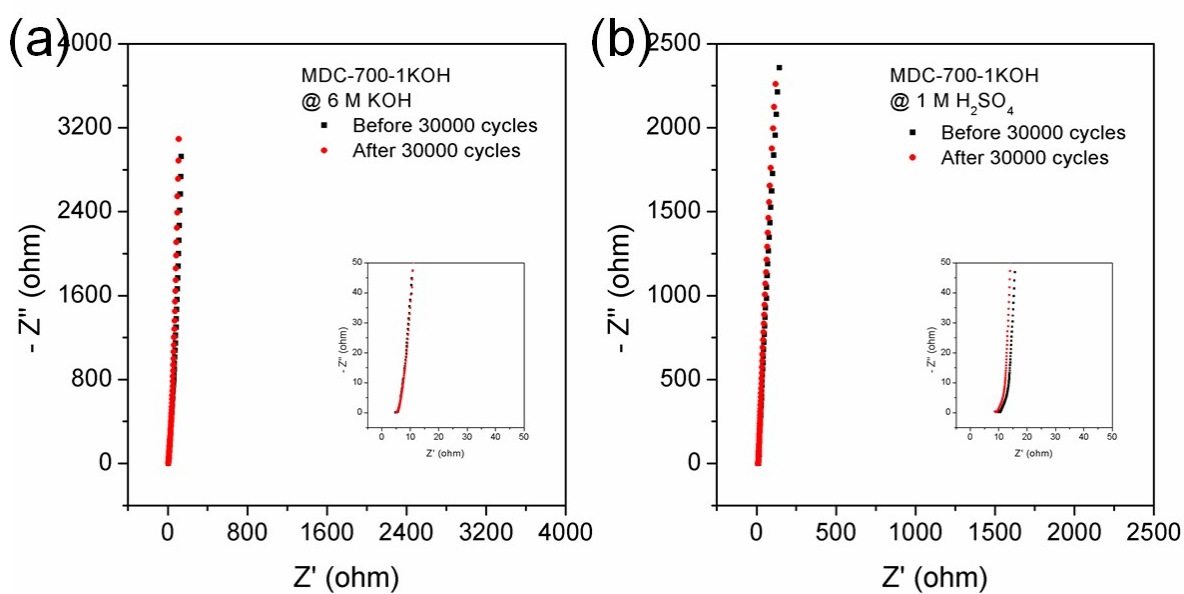

**Figure S21.** Nyquist plots for MDC-700-1KOH using 3E system before and after 30000 cycles in 6 M KOH (a) and 1 M H<sub>2</sub>SO<sub>4</sub> (b).

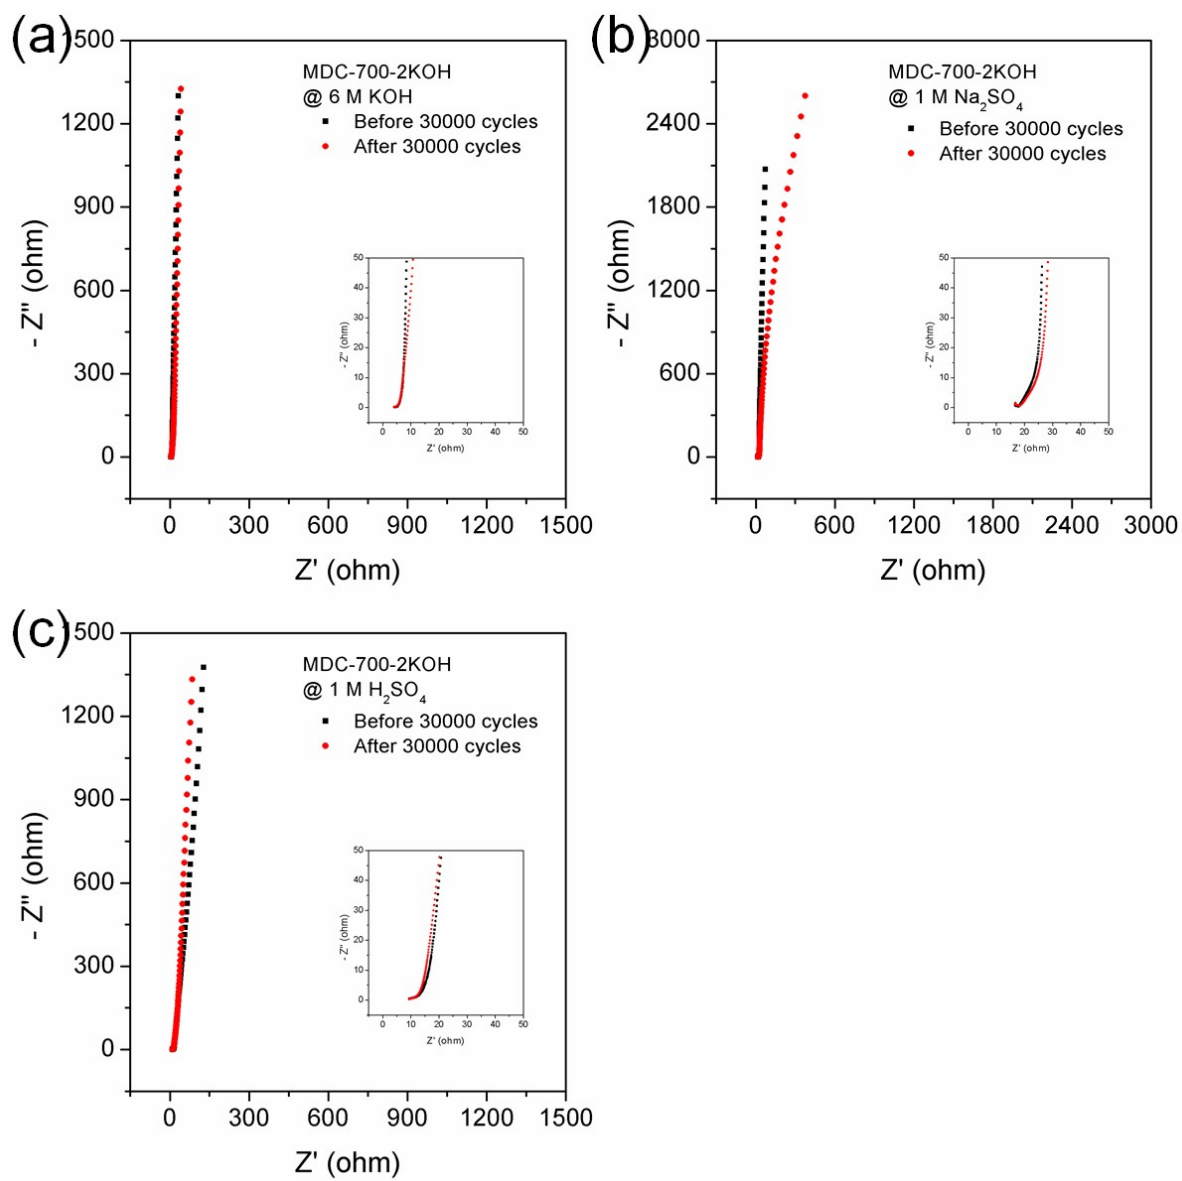

**Figure S22.** Nyquist plots for MDC-700-2KOH using 3E system before and after 30000 cycles in 6 M KOH (a), 1 M  $\text{Na}_2\text{SO}_4$  (b), and 1 M  $\text{H}_2\text{SO}_4$  (c).



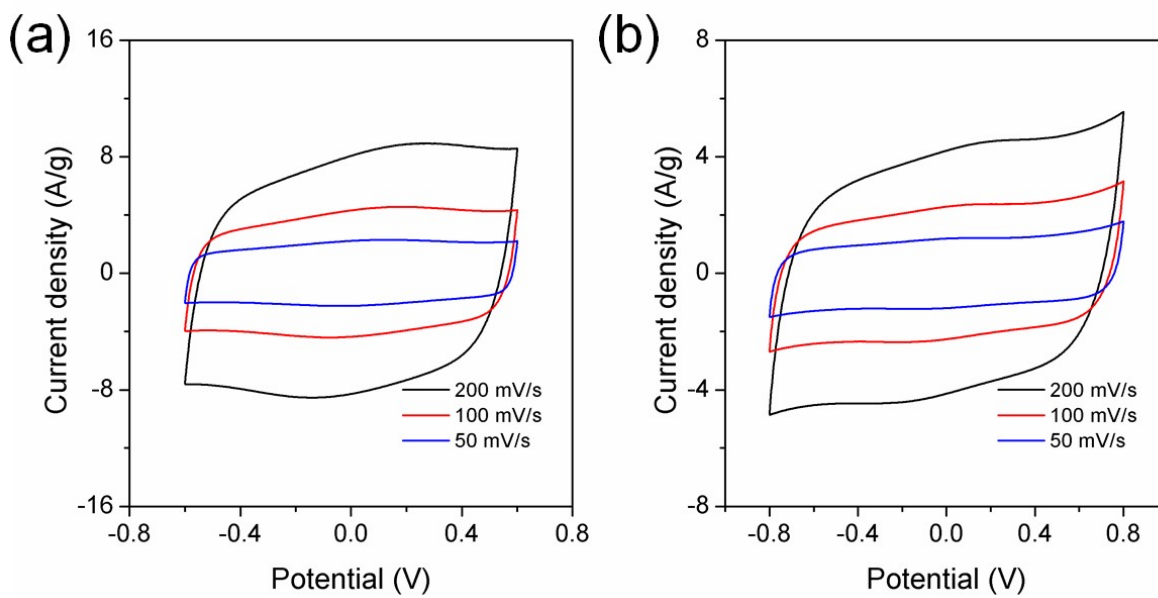

**Figure S23.** CV curves for MDC-700-2KOH using Swagelok cell-based 2E system in 1 M KOH (a) and 1 M Na<sub>2</sub>SO<sub>4</sub> (b).

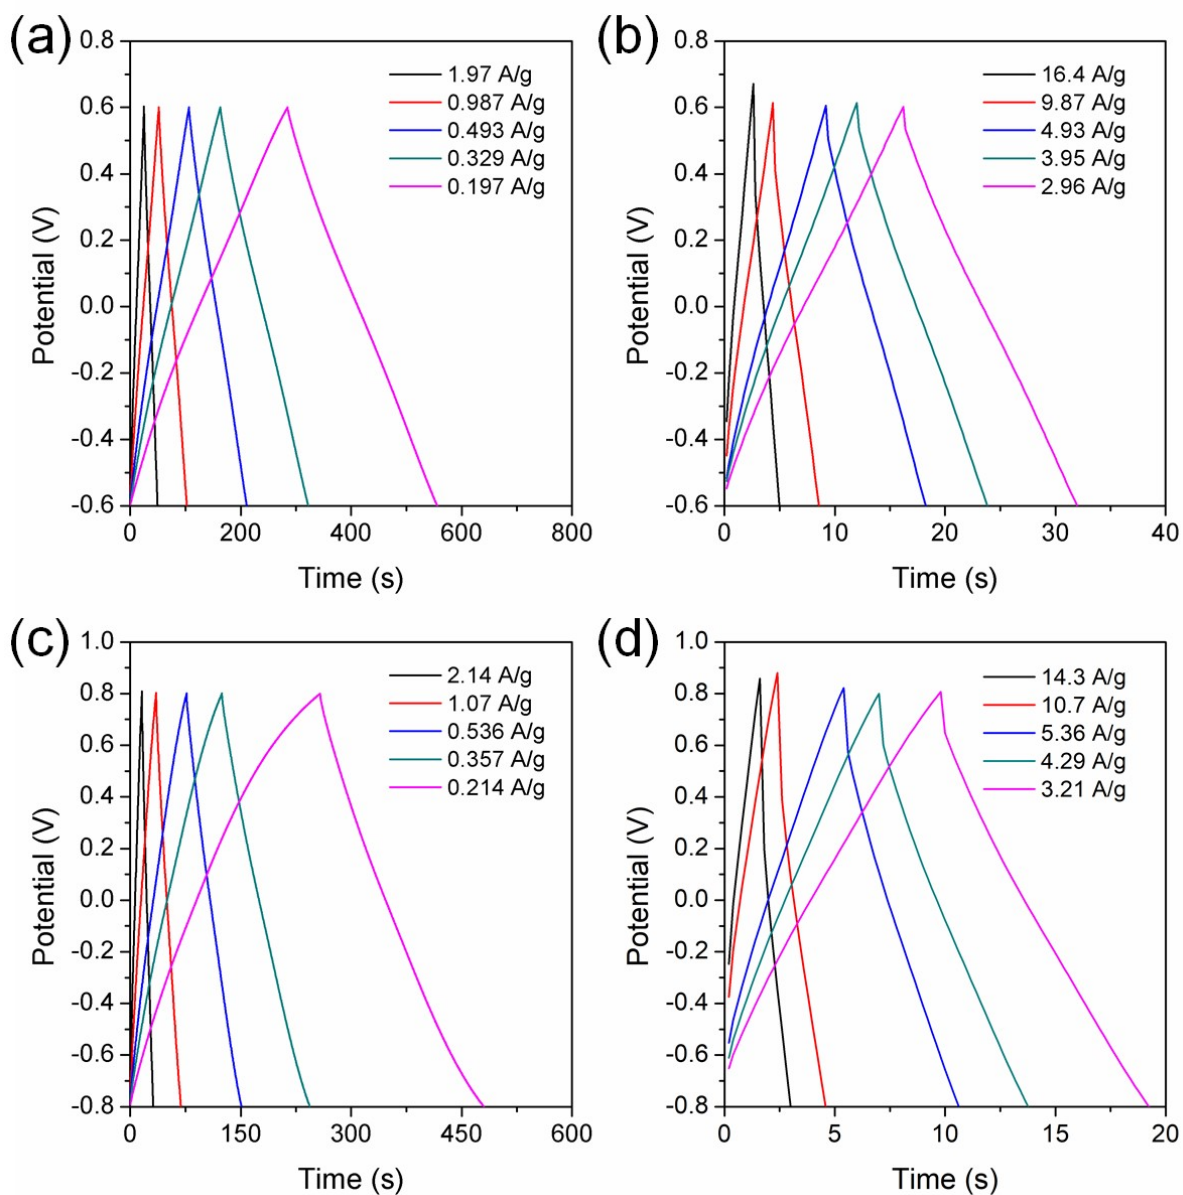

**Figure S24.** GCD curves for MDC-700-2KOH using Swagelok cell-based 2E system in 1 M KOH (a and b) and 1 M Na<sub>2</sub>SO<sub>4</sub> (c and d).

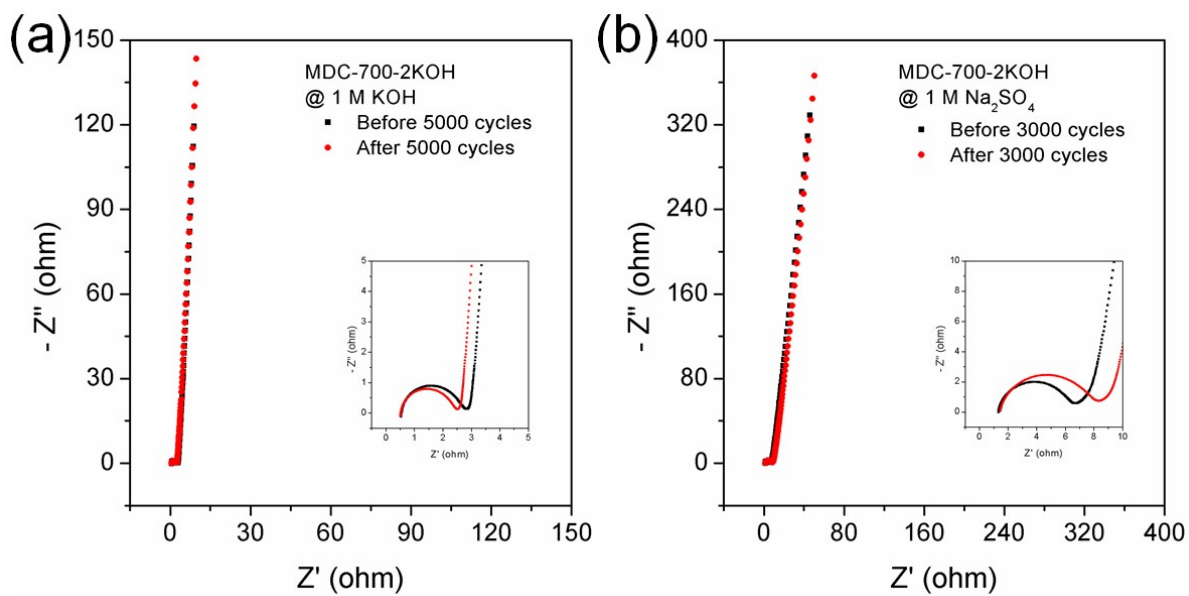

**Figure S25.** Nyquist plots for MDC-700-2KOH using Swagelok cell-based 2E system in 1 M KOH (a) and 1 M  $\text{Na}_2\text{SO}_4$  (b).

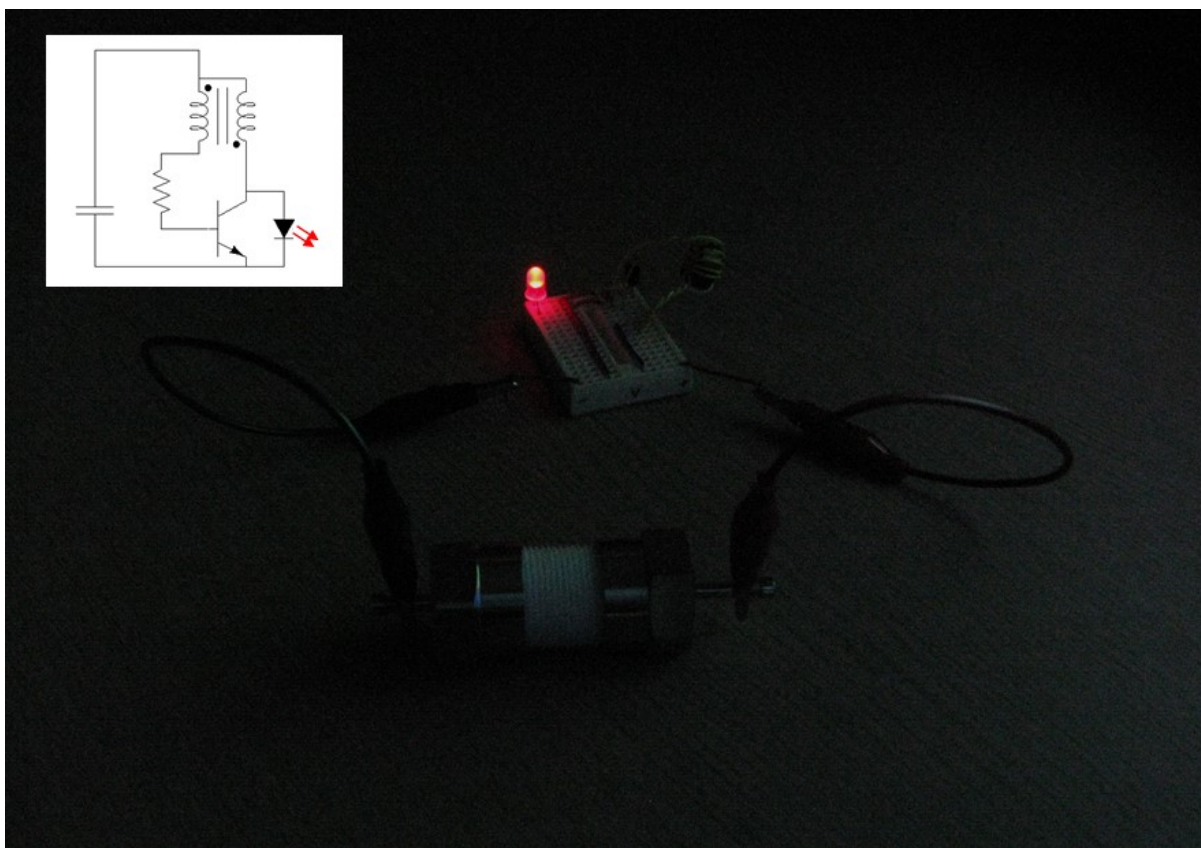

**Figure S26.** Digital photo image of the charged MDC-700-2KOH 2E capacitor lighting the red light-emitting diode which can operate at above 1.20 V. The electrolyte is 1.0 M  $\text{Na}_2\text{SO}_4$ . The minimum operation voltage of the red LED is controlled by the Joule thief circuit. Inset indicates the corresponding circuit diagram.

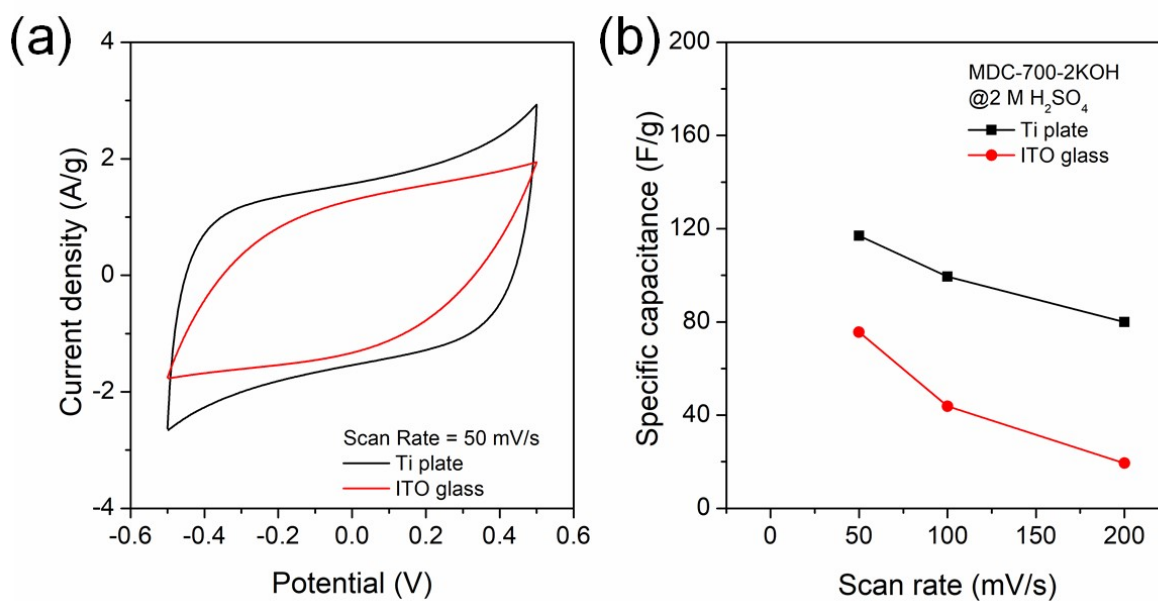

**Figure S27.** CV results for MDC-700-2KOH using ITO glass-based or Ti plate-based 2E systems in 2 M H<sub>2</sub>SO<sub>4</sub> electrolyte (potential window: -0.5 V ~ 0.5 V). CV curves at 100 mV s<sup>-1</sup> (a). Dependence of specific capacitance on scan rate (b).

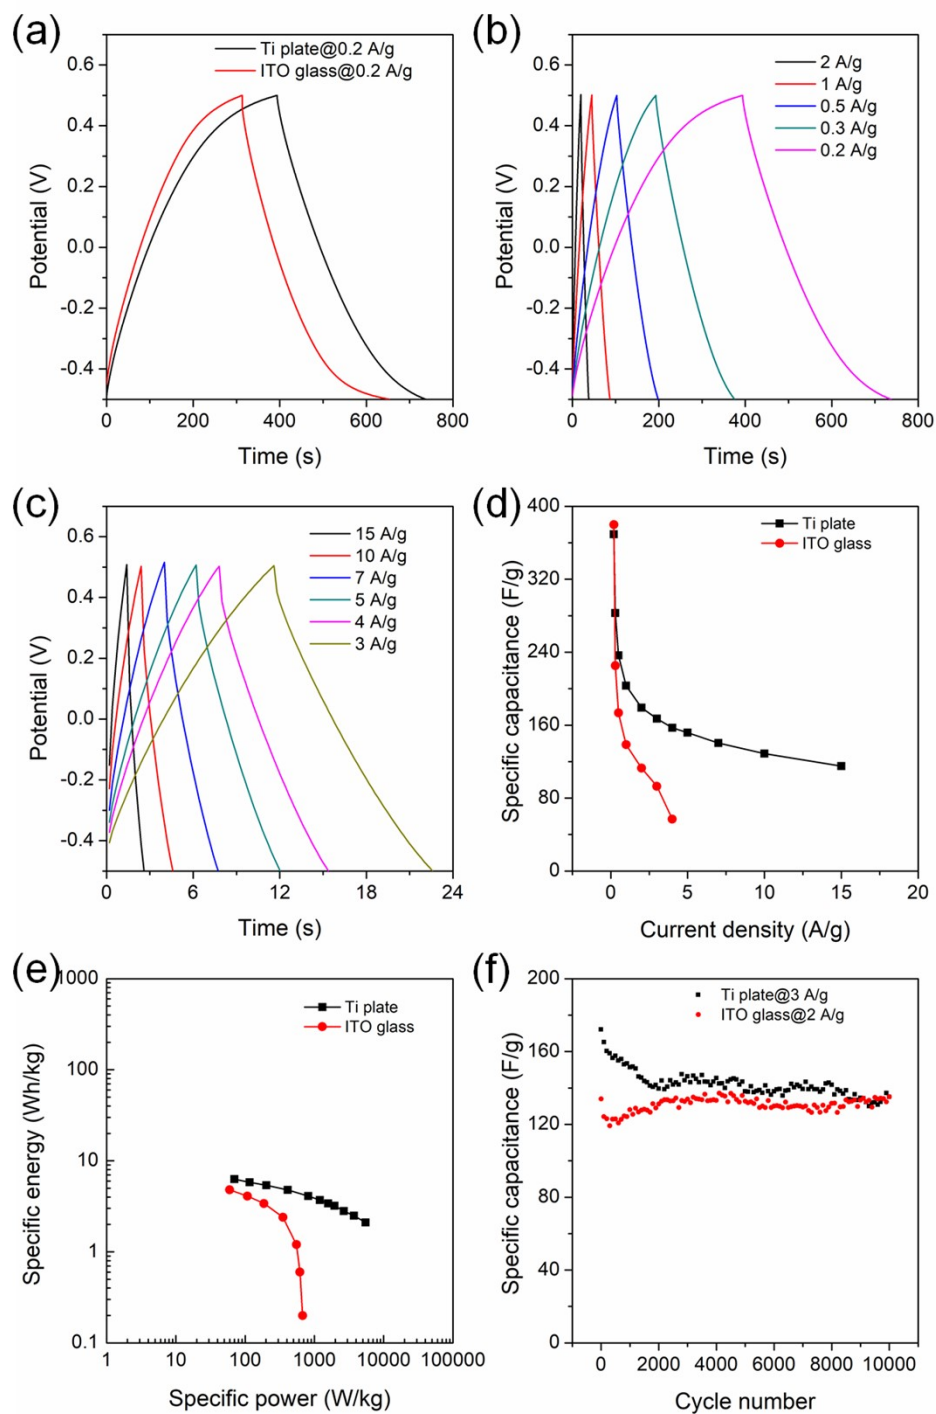

**Figure S28.** GCD results for MDC-700-2KOH using 2E systems in 2 M H<sub>2</sub>SO<sub>4</sub> electrolyte (potential window: -0.5 V ~ 0.5 V). GCD curves at 0.2 A g<sup>-1</sup> (a). GCD curves at low current densities using Ti plate-based system (b). GCD curves at high current densities under Ti plate-based systems (c). The dependence of specific capacitance on current density (d). Ragone plots (e). The variation of specific capacitance as a function of cycle number (f).

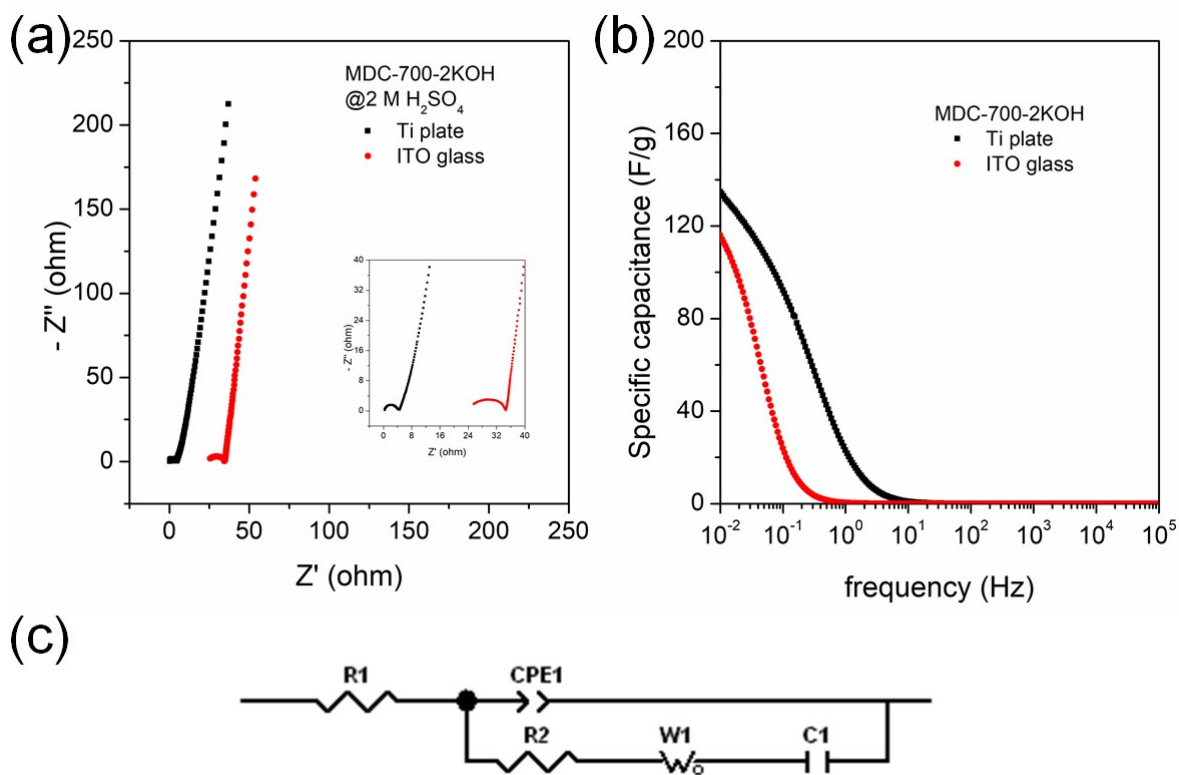

**Figure S29.** EIS results for MDC-700-2KOH using ITO glass-based or Ti plate-based 2E systems in 2 M  $H_2SO_4$  electrolyte (applied constant potential: 0 V). Nyquist plots (a). Bode plots from specific capacitance (b). The corresponding equivalent circuit (c).

**Table S1.** Crystal data and structure refinement for Zn-DpyDtolP-MOF.

---

|                                   |                                                                                                      |
|-----------------------------------|------------------------------------------------------------------------------------------------------|
| Empirical formula                 | C <sub>44</sub> H <sub>30</sub> N <sub>6</sub> Zn                                                    |
| Formula weight                    | 708.11                                                                                               |
| Temperature                       | 100(2) K                                                                                             |
| Wavelength                        | 1.54178 Å                                                                                            |
| Crystal system                    | Trigonal                                                                                             |
| Space group                       | R -3                                                                                                 |
| Unit cell dimensions              | a = 32.9136(15) Å      α = 90°.<br>b = 32.9136(15) Å      β = 90°.<br>c = 9.2886(5) Å      γ = 120°. |
| Volume                            | 8714.3(9) Å <sup>3</sup>                                                                             |
| Z                                 | 9                                                                                                    |
| Density (calculated)              | 1.214 Mg/m <sup>3</sup>                                                                              |
| Absorption coefficient            | 1.167 mm <sup>-1</sup>                                                                               |
| F(000)                            | 3294                                                                                                 |
| Crystal size                      | 0.01 x 0.01 x 0.08 mm <sup>3</sup>                                                                   |
| Theta range for data collection   | 2.685 to 78.955°.                                                                                    |
| Index ranges                      | -41 ≤ h ≤ 41, -39 ≤ k ≤ 41, -11 ≤ l ≤ 11                                                             |
| Reflections collected             | 32296                                                                                                |
| Independent reflections           | 4118 [R(int) = 0.0504]                                                                               |
| Completeness to theta = 67.679°   | 100.0 %                                                                                              |
| Refinement method                 | Full-matrix least-squares on F <sup>2</sup>                                                          |
| Data / restraints / parameters    | 4118 / 0 / 233                                                                                       |
| Goodness-of-fit on F <sup>2</sup> | 1.057                                                                                                |
| Final R indices [I > 2σ(I)]       | R1 = 0.0413, wR2 = 0.1071                                                                            |
| R indices (all data)              | R1 = 0.0535, wR2 = 0.1135                                                                            |
| Largest diff. peak and hole       | 0.448 and -0.338 e.Å <sup>-3</sup>                                                                   |

---



**Table S2.** Atomic coordinates ( $\text{\AA} \times 10^4$ ) and equivalent isotropic displacement parameters ( $\text{\AA}^2 \times 10^3$ ) for Zn-DpyDtolP-MOF.  $U(\text{eq})$  is defined as one third of the trace of the orthogonalized  $U^{ij}$  tensor.

|       | x       | y       | z        | U(eq) |
|-------|---------|---------|----------|-------|
| Zn(1) | 5000    | 0       | 0        | 14(1) |
| N(1)  | 4992(1) | 591(1)  | 718(2)   | 14(1) |
| N(2)  | 5344(1) | 11(1)   | 1890(2)  | 15(1) |
| N(3)  | 5756(1) | 434(1)  | -911(2)  | 18(1) |
| C(1)  | 4747(1) | 775(1)  | 79(2)    | 16(1) |
| C(2)  | 4773(1) | 1149(1) | 964(2)   | 20(1) |
| C(3)  | 5027(1) | 1178(1) | 2149(2)  | 19(1) |
| C(4)  | 5161(1) | 822(1)  | 1998(2)  | 15(1) |
| C(5)  | 5410(1) | 720(1)  | 3038(2)  | 16(1) |
| C(6)  | 5505(1) | 347(1)  | 2944(2)  | 16(1) |
| C(7)  | 5816(1) | 283(1)  | 3892(2)  | 21(1) |
| C(8)  | 5847(1) | -84(1)  | 3384(2)  | 22(1) |
| C(9)  | 5551(1) | -255(1) | 2113(2)  | 16(1) |
| C(10) | 5505(1) | -619(1) | 1219(2)  | 16(1) |
| C(11) | 5590(1) | 1033(1) | 4323(2)  | 17(1) |
| C(12) | 5433(1) | 856(1)  | 5700(2)  | 20(1) |
| C(13) | 5594(1) | 1149(1) | 6897(2)  | 24(1) |
| C(14) | 5919(1) | 1625(1) | 6760(3)  | 27(1) |
| C(15) | 6078(1) | 1799(1) | 5385(3)  | 28(1) |
| C(16) | 5917(1) | 1510(1) | 4184(2)  | 23(1) |
| C(17) | 6101(1) | 1933(1) | 8081(3)  | 41(1) |
| C(18) | 6707(1) | 906(1)  | -1671(2) | 17(1) |
| C(19) | 6544(1) | 1065(1) | -556(2)  | 21(1) |
| C(20) | 6070(1) | 821(1)  | -219(2)  | 21(1) |
| C(21) | 5915(1) | 278(1)  | -1975(2) | 20(1) |
| C(22) | 6381(1) | 500(1)  | -2391(2) | 20(1) |

**Table S3.** Bond lengths [Å] and angles [°] for Zn-DpyDtolP-MOF.

---

|               |            |
|---------------|------------|
| Zn(1)-N(1)#1  | 2.0683(16) |
| Zn(1)-N(1)    | 2.0683(16) |
| Zn(1)-N(2)#1  | 2.0789(16) |
| Zn(1)-N(2)    | 2.0790(16) |
| Zn(1)-N(3)    | 2.3223(16) |
| Zn(1)-N(3)#1  | 2.3224(16) |
| N(1)-C(1)     | 1.363(2)   |
| N(1)-C(4)     | 1.371(2)   |
| N(2)-C(9)     | 1.367(2)   |
| N(2)-C(6)     | 1.371(3)   |
| N(3)-C(21)    | 1.334(3)   |
| N(3)-C(20)    | 1.337(3)   |
| C(1)-C(10)#1  | 1.408(3)   |
| C(1)-C(2)     | 1.448(3)   |
| C(2)-C(3)     | 1.355(3)   |
| C(2)-H(2)     | 0.9500     |
| C(3)-C(4)     | 1.450(3)   |
| C(3)-H(3)     | 0.9500     |
| C(4)-C(5)     | 1.413(3)   |
| C(5)-C(6)     | 1.412(3)   |
| C(5)-C(11)    | 1.493(3)   |
| C(6)-C(7)     | 1.443(3)   |
| C(7)-C(8)     | 1.348(3)   |
| C(7)-H(7)     | 0.9500     |
| C(8)-C(9)     | 1.452(3)   |
| C(8)-H(8)     | 0.9500     |
| C(9)-C(10)    | 1.403(3)   |
| C(10)-C(1)#1  | 1.408(3)   |
| C(10)-C(18)#2 | 1.487(3)   |
| C(11)-C(12)   | 1.394(3)   |
| C(11)-C(16)   | 1.395(3)   |
| C(12)-C(13)   | 1.392(3)   |
| C(12)-H(12)   | 0.9500     |
| C(13)-C(14)   | 1.391(3)   |
| C(13)-H(13)   | 0.9500     |

|                     |            |
|---------------------|------------|
| C(14)-C(15)         | 1.391(3)   |
| C(14)-C(17)         | 1.513(3)   |
| C(15)-C(16)         | 1.388(3)   |
| C(15)-H(15)         | 0.9500     |
| C(16)-H(16)         | 0.9500     |
| C(17)-H(17A)        | 0.9800     |
| C(17)-H(17B)        | 0.9800     |
| C(17)-H(17C)        | 0.9800     |
| C(18)-C(19)         | 1.385(3)   |
| C(18)-C(22)         | 1.397(3)   |
| C(18)-C(10)#3       | 1.487(3)   |
| C(19)-C(20)         | 1.388(3)   |
| C(19)-H(19)         | 0.9500     |
| C(20)-H(20)         | 0.9500     |
| C(21)-C(22)         | 1.385(3)   |
| C(21)-H(21)         | 0.9500     |
| C(22)-H(22)         | 0.9500     |
|                     |            |
| N(1)#1-Zn(1)-N(1)   | 180.0      |
| N(1)#1-Zn(1)-N(2)#1 | 88.53(6)   |
| N(1)-Zn(1)-N(2)#1   | 91.47(6)   |
| N(1)#1-Zn(1)-N(2)   | 91.47(6)   |
| N(1)-Zn(1)-N(2)     | 88.53(6)   |
| N(2)#1-Zn(1)-N(2)   | 180.00(8)  |
| N(1)#1-Zn(1)-N(3)   | 86.99(6)   |
| N(1)-Zn(1)-N(3)     | 93.01(6)   |
| N(2)#1-Zn(1)-N(3)   | 96.28(6)   |
| N(2)-Zn(1)-N(3)     | 83.72(6)   |
| N(1)#1-Zn(1)-N(3)#1 | 93.01(6)   |
| N(1)-Zn(1)-N(3)#1   | 86.98(6)   |
| N(2)#1-Zn(1)-N(3)#1 | 83.72(6)   |
| N(2)-Zn(1)-N(3)#1   | 96.28(6)   |
| N(3)-Zn(1)-N(3)#1   | 180.0      |
| C(1)-N(1)-C(4)      | 107.22(16) |
| C(1)-N(1)-Zn(1)     | 124.44(13) |
| C(4)-N(1)-Zn(1)     | 127.61(13) |
| C(9)-N(2)-C(6)      | 107.03(16) |

|                      |            |
|----------------------|------------|
| C(9)-N(2)-Zn(1)      | 123.95(13) |
| C(6)-N(2)-Zn(1)      | 127.18(13) |
| C(21)-N(3)-C(20)     | 117.27(17) |
| C(21)-N(3)-Zn(1)     | 122.58(13) |
| C(20)-N(3)-Zn(1)     | 119.38(13) |
| N(1)-C(1)-C(10)#1    | 125.76(18) |
| N(1)-C(1)-C(2)       | 109.52(17) |
| C(10)#1-C(1)-C(2)    | 124.69(18) |
| C(3)-C(2)-C(1)       | 107.05(18) |
| C(3)-C(2)-H(2)       | 126.5      |
| C(1)-C(2)-H(2)       | 126.5      |
| C(2)-C(3)-C(4)       | 106.86(18) |
| C(2)-C(3)-H(3)       | 126.6      |
| C(4)-C(3)-H(3)       | 126.6      |
| N(1)-C(4)-C(5)       | 125.62(18) |
| N(1)-C(4)-C(3)       | 109.31(17) |
| C(5)-C(4)-C(3)       | 125.02(18) |
| C(6)-C(5)-C(4)       | 124.91(18) |
| C(6)-C(5)-C(11)      | 117.76(17) |
| C(4)-C(5)-C(11)      | 117.33(17) |
| N(2)-C(6)-C(5)       | 125.56(18) |
| N(2)-C(6)-C(7)       | 109.50(17) |
| C(5)-C(6)-C(7)       | 124.80(18) |
| C(8)-C(7)-C(6)       | 107.11(18) |
| C(8)-C(7)-H(7)       | 126.4      |
| C(6)-C(7)-H(7)       | 126.4      |
| C(7)-C(8)-C(9)       | 107.16(18) |
| C(7)-C(8)-H(8)       | 126.4      |
| C(9)-C(8)-H(8)       | 126.4      |
| N(2)-C(9)-C(10)      | 125.62(18) |
| N(2)-C(9)-C(8)       | 109.17(17) |
| C(10)-C(9)-C(8)      | 125.14(18) |
| C(9)-C(10)-C(1)#1    | 127.52(18) |
| C(9)-C(10)-C(18)#2   | 116.99(17) |
| C(1)#1-C(10)-C(18)#2 | 115.48(17) |
| C(12)-C(11)-C(16)    | 118.15(19) |
| C(12)-C(11)-C(5)     | 120.49(18) |

|                     |            |
|---------------------|------------|
| C(16)-C(11)-C(5)    | 121.35(18) |
| C(13)-C(12)-C(11)   | 120.6(2)   |
| C(13)-C(12)-H(12)   | 119.7      |
| C(11)-C(12)-H(12)   | 119.7      |
| C(14)-C(13)-C(12)   | 121.3(2)   |
| C(14)-C(13)-H(13)   | 119.4      |
| C(12)-C(13)-H(13)   | 119.4      |
| C(13)-C(14)-C(15)   | 117.9(2)   |
| C(13)-C(14)-C(17)   | 120.3(2)   |
| C(15)-C(14)-C(17)   | 121.8(2)   |
| C(16)-C(15)-C(14)   | 121.2(2)   |
| C(16)-C(15)-H(15)   | 119.4      |
| C(14)-C(15)-H(15)   | 119.4      |
| C(15)-C(16)-C(11)   | 120.8(2)   |
| C(15)-C(16)-H(16)   | 119.6      |
| C(11)-C(16)-H(16)   | 119.6      |
| C(14)-C(17)-H(17A)  | 109.5      |
| C(14)-C(17)-H(17B)  | 109.5      |
| H(17A)-C(17)-H(17B) | 109.5      |
| C(14)-C(17)-H(17C)  | 109.5      |
| H(17A)-C(17)-H(17C) | 109.5      |
| H(17B)-C(17)-H(17C) | 109.5      |
| C(19)-C(18)-C(22)   | 117.46(18) |
| C(19)-C(18)-C(10)#3 | 121.63(18) |
| C(22)-C(18)-C(10)#3 | 120.89(18) |
| C(18)-C(19)-C(20)   | 119.14(19) |
| C(18)-C(19)-H(19)   | 120.4      |
| C(20)-C(19)-H(19)   | 120.4      |
| N(3)-C(20)-C(19)    | 123.55(19) |
| N(3)-C(20)-H(20)    | 118.2      |
| C(19)-C(20)-H(20)   | 118.2      |
| N(3)-C(21)-C(22)    | 123.23(19) |
| N(3)-C(21)-H(21)    | 118.4      |
| C(22)-C(21)-H(21)   | 118.4      |
| C(21)-C(22)-C(18)   | 119.35(19) |
| C(21)-C(22)-H(22)   | 120.3      |
| C(18)-C(22)-H(22)   | 120.3      |

---

Symmetry transformations used to generate equivalent atoms:

#1  $-x+1, -y, -z$     #2  $-y+2/3, x-y-2/3, z+1/3$     #3  $-x+y+4/3, -x+2/3, z-1/3$

**Table S4.** Anisotropic displacement parameters ( $\text{\AA}^2 \times 10^3$ ) for Zn-DpyDtolP-MOF. The anisotropic displacement factor exponent takes the form:  $-2p^2[h^2 a^{*2}U^{11} + \dots + 2 h k a^* b^* U^{12}]$

|       | U <sup>11</sup> | U <sup>22</sup> | U <sup>33</sup> | U <sup>23</sup> | U <sup>13</sup> | U <sup>12</sup> |
|-------|-----------------|-----------------|-----------------|-----------------|-----------------|-----------------|
| Zn(1) | 14(1)           | 15(1)           | 15(1)           | 0(1)            | 0(1)            | 9(1)            |
| N(1)  | 14(1)           | 16(1)           | 16(1)           | 1(1)            | 0(1)            | 9(1)            |
| N(2)  | 14(1)           | 16(1)           | 16(1)           | 2(1)            | 0(1)            | 9(1)            |
| N(3)  | 15(1)           | 19(1)           | 17(1)           | 3(1)            | 0(1)            | 8(1)            |
| C(1)  | 16(1)           | 15(1)           | 18(1)           | 2(1)            | 2(1)            | 8(1)            |
| C(2)  | 22(1)           | 19(1)           | 24(1)           | -1(1)           | -1(1)           | 13(1)           |
| C(3)  | 22(1)           | 19(1)           | 21(1)           | -4(1)           | -2(1)           | 13(1)           |
| C(4)  | 15(1)           | 16(1)           | 17(1)           | 0(1)            | 0(1)            | 8(1)            |
| C(5)  | 14(1)           | 17(1)           | 17(1)           | 0(1)            | 1(1)            | 7(1)            |
| C(6)  | 16(1)           | 18(1)           | 16(1)           | 0(1)            | -1(1)           | 9(1)            |
| C(7)  | 21(1)           | 23(1)           | 19(1)           | -2(1)           | -6(1)           | 12(1)           |
| C(8)  | 24(1)           | 25(1)           | 22(1)           | -2(1)           | -6(1)           | 17(1)           |
| C(9)  | 15(1)           | 18(1)           | 19(1)           | 3(1)            | 0(1)            | 10(1)           |
| C(10) | 15(1)           | 16(1)           | 18(1)           | 4(1)            | 2(1)            | 9(1)            |
| C(11) | 17(1)           | 20(1)           | 19(1)           | 0(1)            | -3(1)           | 12(1)           |
| C(12) | 20(1)           | 21(1)           | 20(1)           | 0(1)            | -1(1)           | 11(1)           |
| C(13) | 26(1)           | 32(1)           | 19(1)           | -2(1)           | -1(1)           | 18(1)           |
| C(14) | 28(1)           | 29(1)           | 29(1)           | -10(1)          | -10(1)          | 18(1)           |
| C(15) | 30(1)           | 18(1)           | 34(1)           | -6(1)           | -9(1)           | 10(1)           |
| C(16) | 25(1)           | 21(1)           | 23(1)           | 1(1)            | -3(1)           | 11(1)           |
| C(17) | 51(2)           | 39(2)           | 35(1)           | -17(1)          | -15(1)          | 24(1)           |
| C(18) | 14(1)           | 19(1)           | 17(1)           | 4(1)            | 1(1)            | 7(1)            |
| C(19) | 16(1)           | 20(1)           | 23(1)           | -2(1)           | 1(1)            | 6(1)            |
| C(20) | 17(1)           | 21(1)           | 22(1)           | 0(1)            | 4(1)            | 8(1)            |
| C(21) | 16(1)           | 21(1)           | 19(1)           | -1(1)           | 1(1)            | 6(1)            |
| C(22) | 18(1)           | 23(1)           | 17(1)           | -1(1)           | 2(1)            | 8(1)            |

**Table S5.** Hydrogen coordinates ( $\text{\AA} \times 10^4$ ) and isotropic displacement parameters ( $\text{\AA}^2 \times 10^3$ ) for Zn-DpyDtolP-MOF.

|        | x    | y    | z     | U(eq) |
|--------|------|------|-------|-------|
| H(2)   | 4638 | 1339 | 755   | 24    |
| H(3)   | 5102 | 1391 | 2929  | 23    |
| H(7)   | 5970 | 465  | 4719  | 25    |
| H(8)   | 6028 | -208 | 3782  | 26    |
| H(12)  | 5214 | 532  | 5823  | 24    |
| H(13)  | 5480 | 1022 | 7825  | 29    |
| H(15)  | 6301 | 2123 | 5265  | 34    |
| H(16)  | 6031 | 1638 | 3256  | 28    |
| H(17A) | 5854 | 1820 | 8814  | 62    |
| H(17B) | 6194 | 2257 | 7821  | 62    |
| H(17C) | 6373 | 1923 | 8465  | 62    |
| H(19)  | 6754 | 1338 | -28   | 25    |
| H(20)  | 5962 | 935  | 544   | 25    |
| H(21)  | 5697 | 2    | -2473 | 24    |
| H(22)  | 6478 | 377  | -3158 | 24    |



**Table S6.** The XPS analysis data.

| Samples      | Zn (at.%)         | N-dopant (%) | N1s binding energy (eV) |                  |             |                   |
|--------------|-------------------|--------------|-------------------------|------------------|-------------|-------------------|
|              |                   |              | Pyridinic-N (N-6)       | Pyrrolic-N (N-5) | Pyridone    | Graphitic-N (N-Q) |
| MDC-700      | 1.36              | 5.92         | 398.3 (56%)             | 399.4 (24%)      | 400.5 (15%) | 401.4 (5%)        |
| MDC-800      | 0.72              | 4.67         | 398.2 (52%)             | 399.5 (23%)      | 400.8 (20%) | 401.9 (5%)        |
| MDC-900      | 0.34              | 3.63         | 398.4 (48%)             | 399.8 (13%)      | 400.9 (32%) | 402.5 (7%)        |
| MDC-700-1KOH | Not detected.     | 3.15         | 398.5 (21%)             | 399.9 (46%)      | -           | 401.4 (33%)       |
| MDC-700-2KOH | Negligible amount | 2.32         | 398.4 (23%)             | 399.9 (59%)      | -           | 401.7 (17%)       |

**Table S7.** The electrochemical parameters of MDC-700 calculated from GCD curves in 6 M KOH electrolyte with 3E system.

| Current density (A/g) | Specific capacitance (F/g) | Potential drop (V) | ESR ( $\Omega$ ) | EDLC (F/g) | PC (F/g) | PC (%) | Specific energy (Wh/kg) | Specific power (W/kg) |
|-----------------------|----------------------------|--------------------|------------------|------------|----------|--------|-------------------------|-----------------------|
| 10                    | 34.3                       | 0.476              | 950.2            | 18.0       | 16.3     | 47.5   | 1.3                     | 2625                  |
| 5                     | 47.3                       | 0.486              | 1942.2           | 24.3       | 23.0     | 48.6   | 1.7                     | 1286                  |
| 3                     | 65.4                       | 0.504              | 3362.4           | 32.4       | 33.0     | 50.5   | 2.2                     | 744                   |
| 2                     | 84.5                       | 0.510              | 5094.6           | 41.5       | 43.0     | 50.9   | 2.8                     | 491                   |
| 1                     | 121.2                      | 0.496              | 9923.0           | 61.1       | 60.1     | 49.6   | 4.3                     | 252                   |
| 0.5                   | 156.6                      | 0.462              | 18497.8          | 84.2       | 72.4     | 46.2   | 6.3                     | 134                   |
| 0.2                   | 195.4                      | 0.406              | 40683.8          | 115.9      | 79.5     | 40.7   | 9.6                     | 59                    |

**Table S8.** The electrochemical parameters of MDC-700-1KOH calculated from GCD curves in 6 M KOH electrolyte with 3E system.

| Current density (A/g) | Specific capacitance (F/g) | Potential drop (V) | ESR ( $\Omega$ ) | EDLC (F/g) | PC (F/g) | PC (%) | Specific energy (Wh/kg) | Specific power (W/kg) |
|-----------------------|----------------------------|--------------------|------------------|------------|----------|--------|-------------------------|-----------------------|
| 50                    | 112.6                      | 0.200              | 80.4             | 90.0       | 22.6     | 20.1   | 10.0                    | 19980                 |
| 30                    | 111.9                      | 0.194              | 129.4            | 90.0       | 21.9     | 19.5   | 10.1                    | 12091                 |
| 20                    | 109.0                      | 0.192              | 192.6            | 88.0       | 21.0     | 19.3   | 9.9                     | 8074                  |
| 10                    | 120.4                      | 0.214              | 427.4            | 94.7       | 25.7     | 21.3   | 10.3                    | 3931                  |
| 5                     | 127.7                      | 0.216              | 868.4            | 100.0      | 27.7     | 21.7   | 10.9                    | 1957                  |
| 3                     | 134.2                      | 0.216              | 1440.4           | 105.2      | 29.0     | 21.6   | 11.5                    | 1176                  |
| 2                     | 139.1                      | 0.214              | 2147.8           | 109.2      | 29.9     | 21.5   | 11.9                    | 785                   |
| 1                     | 146.7                      | 0.214              | 4289.0           | 115.3      | 31.4     | 21.4   | 12.6                    | 393                   |
| 0.5                   | 155.9                      | 0.216              | 8663.8           | 122.1      | 33.8     | 21.7   | 13.3                    | 196                   |
| 0.2                   | 171.6                      | 0.222              | 22196.4          | 133.5      | 38.1     | 22.2   | 14.4                    | 78                    |

**Table S9.** The electrochemical parameters of MDC-700-2KOH calculated from GCD curves in 6 M KOH electrolyte with 3E system.

| Current density (A/g) | Specific capacitance (F/g) | Potential drop (V) | ESR ( $\Omega$ ) | EDLC (F/g) | PC (F/g) | PC (%) | Specific energy (Wh/kg) | Specific power (W/kg) |
|-----------------------|----------------------------|--------------------|------------------|------------|----------|--------|-------------------------|-----------------------|
| 190                   | 269.3                      | 0.154              | 16.2             | 228.0      | 41.3     | 15.3   | 26.8                    | 80423                 |
| 170                   | 277.7                      | 0.142              | 16.8             | 238.0      | 39.7     | 14.3   | 28.3                    | 72853                 |
| 150                   | 280.6                      | 0.144              | 19.2             | 240.0      | 40.6     | 14.5   | 28.5                    | 64156                 |
| 130                   | 283.1                      | 0.144              | 220.             | 242.7      | 40.4     | 14.3   | 28.9                    | 55676                 |
| 100                   | 294.9                      | 0.142              | 28.2             | 253.3      | 41.6     | 14.1   | 30.2                    | 42935                 |
| 50                    | 299.4                      | 0.154              | 61.4             | 253.3      | 46.1     | 15.4   | 29.8                    | 21158                 |
| 40                    | 299.2                      | 0.154              | 76.6             | 253.3      | 45.9     | 15.3   | 29.8                    | 16935                 |
| 30                    | 301.6                      | 0.158              | 105.2            | 254.0      | 47.6     | 15.8   | 29.7                    | 12633                 |
| 20                    | 304.1                      | 0.158              | 158.2            | 256.0      | 48.1     | 15.8   | 29.9                    | 8419                  |
| 10                    | 312.7                      | 0.168              | 337.0            | 260.0      | 52.7     | 16.9   | 30.0                    | 4158                  |
| 2                     | 317.3                      | 0.196              | 1955.8           | 255.2      | 62.1     | 19.6   | 28.5                    | 804                   |
| 1                     | 326.3                      | 0.202              | 4024.8           | 260.6      | 65.7     | 20.1   | 28.9                    | 399                   |
| 0.5                   | 338.7                      | 0.208              | 8295.6           | 268.4      | 70.3     | 20.8   | 29.6                    | 198                   |
| 0.3                   | 350.4                      | 0.212              | 14161.0          | 275.9      | 74.5     | 21.3   | 30.2                    | 118                   |
| 0.2                   | 362.3                      | 0.218              | 21718.0          | 283.6      | 78.7     | 21.7   | 30.8                    | 78                    |

**Table S10.** The electrochemical parameters of MDC-700-1KOH calculated from GCD curves in 1 M Na<sub>2</sub>SO<sub>4</sub> electrolyte with 3E system.

| Current density (A/g) | Specific capacitance (F/g) | Potential drop (V) | ESR ( $\Omega$ ) | EDLC (F/g) | PC (F/g) | PC (%) | Specific energy (Wh/kg) | Specific power (W/kg) |
|-----------------------|----------------------------|--------------------|------------------|------------|----------|--------|-------------------------|-----------------------|
| 20                    | 30.2                       | 0.202              | 20.3             | 24.0       | 6.2      | 20.5   | 2.7                     | 7973                  |
| 10                    | 30.8                       | 0.156              | 31.1             | 26.0       | 4.8      | 15.6   | 3.0                     | 4222                  |
| 5                     | 36.1                       | 0.178              | 70.8             | 29.7       | 6.4      | 17.7   | 3.4                     | 2057                  |
| 3                     | 40.5                       | 0.176              | 117.3            | 33.4       | 7.1      | 17.5   | 3.8                     | 1236                  |
| 2                     | 45.3                       | 0.180              | 179.6            | 37.2       | 8.1      | 17.9   | 4.2                     | 820                   |
| 1                     | 53.4                       | 0.174              | 347.8            | 44.1       | 9.3      | 17.4   | 5.1                     | 413                   |
| 0.5                   | 62.8                       | 0.168              | 678.8            | 52.2       | 10.6     | 16.9   | 6.0                     | 208                   |
| 0.3                   | 74.8                       | 0.186              | 1243.2           | 60.8       | 14.0     | 18.7   | 6.9                     | 122                   |
| 0.2                   | 94.7                       | 0.232              | 2324.3           | 72.7       | 22.0     | 23.2   | 7.7                     | 77                    |

**Table S11.** The electrochemical parameters of MDC-700-2KOH calculated from GCD curves in 1 M Na<sub>2</sub>SO<sub>4</sub> electrolyte with 3E system.

| Current density (A/g) | Specific capacitance (F/g) | Potential drop (V) | ESR ( $\Omega$ ) | EDLC (F/g) | PC (F/g) | PC (%) | Specific energy (Wh/kg) | Specific power (W/kg) |
|-----------------------|----------------------------|--------------------|------------------|------------|----------|--------|-------------------------|-----------------------|
| 120                   | 148.7                      | 0.194              | 3.2              | 120.0      | 28.7     | 19.3   | 13.5                    | 48420                 |
| 100                   | 149.0                      | 0.106              | 2.1              | 133.3      | 15.7     | 10.5   | 16.6                    | 44702                 |
| 60                    | 153.6                      | .0116              | 3.8              | 136.0      | 17.6     | 11.5   | 16.7                    | 26547                 |
| 50                    | 152.9                      | 0.084              | 3.4              | 140.0      | 12.9     | 8.4    | 17.8                    | 22888                 |
| 40                    | 151.2                      | 0.082              | 4.1              | 138.7      | 12.5     | 8.3    | 17.7                    | 18344                 |
| 30                    | 152.8                      | 0.070              | 4.7              | 142.0      | 10.8     | 7.1    | 18.3                    | 13950                 |
| 20                    | 152.4                      | 0.056              | 5.6              | 144.0      | 8.4      | 5.5    | 18.9                    | 9445                  |
| 10                    | 151.9                      | 0.048              | 9.6              | 144.7      | 7.2      | 4.7    | 19.1                    | 4761                  |
| 5                     | 153.9                      | 0.044              | 17.9             | 147.0      | 6.9      | 4.5    | 19.5                    | 2388                  |
| 3                     | 156.4                      | 0.048              | 31.4             | 149.0      | 7.4      | 4.7    | 19.7                    | 1429                  |
| 2                     | 159.0                      | 0.050              | 49.2             | 151.2      | 7.8      | 4.9    | 20.0                    | 951                   |
| 1                     | 163.5                      | 0.056              | 111.7            | 154.4      | 9.1      | 5.6    | 20.2                    | 472                   |
| 0.5                   | 172.6                      | 0.066              | 266.2            | 161.1      | 11.5     | 6.7    | 20.9                    | 233                   |
| 0.3                   | 183.7                      | 0.080              | 539.1            | 168.9      | 14.8     | 8.1    | 21.6                    | 138                   |
| 0.2                   | 197.2                      | 0.098              | 984.5            | 177.8      | 19.4     | 9.8    | 22.3                    | 90                    |

**Table S12.** The electrochemical parameters of MDC-700-1KOH calculated from GCD curves in 1 M H<sub>2</sub>SO<sub>4</sub> electrolyte with 3E system.

| Current density (A/g) | Specific capacitance (F/g) | Potential drop (V) | ESR ( $\Omega$ ) | EDLC (F/g) | PC (F/g) | PC (%) | Specific energy (Wh/kg) | Specific power (W/kg) |
|-----------------------|----------------------------|--------------------|------------------|------------|----------|--------|-------------------------|-----------------------|
| 100                   | 145.7                      | 0.122              | 2.4              | 126.7      | 19.0     | 13.0   | 15.4                    | 43885                 |
| 50                    | 146.8                      | 0.160              | 6.4              | 123.3      | 23.5     | 16.0   | 14.4                    | 21002                 |
| 30                    | 146.4                      | 0.152              | 10.2             | 124.0      | 22.4     | 15.3   | 14.6                    | 12708                 |
| 20                    | 144.9                      | 0.144              | 14.4             | 124.0      | 20.9     | 14.4   | 14.7                    | 8558                  |
| 10                    | 174.5                      | 0.190              | 19.0             | 141.3      | 33.2     | 19.0   | 15.9                    | 4050                  |
| 5                     | 182.8                      | 0.202              | 80.56            | 146.0      | 36.8     | 20.1   | 16.2                    | 1997                  |
| 3                     | 193.7                      | 0.214              | 142.2            | 152.4      | 41.3     | 21.3   | 16.7                    | 1180                  |
| 2                     | 205.1                      | 0.228              | 227.2            | 158.5      | 46.6     | 22.7   | 17.0                    | 773                   |
| 1                     | 237.8                      | 0.262              | 523.1            | 175.6      | 62.2     | 26.2   | 18.0                    | 369                   |
| 0.5                   | 275.6                      | 0.282              | 1129.2           | 197.1      | 78.5     | 28.5   | 19.6                    | 179                   |
| 0.3                   | 361.1                      | 0.328              | 2186.1           | 242.7      | 118.4    | 32.8   | 22.7                    | 101                   |
| 0.2                   | 589.7                      | 0.436              | 4367.6           | 332.0      | 257.7    | 43.7   | 26.0                    | 56                    |

**Table S13.** The electrochemical parameters of MDC-700-2KOH calculated from GCD curves in 1 M H<sub>2</sub>SO<sub>4</sub> electrolyte with 3E system.

| Current density (A/g) | Specific capacitance (F/g) | Potential drop (V) | ESR ( $\Omega$ ) | EDLC (F/g) | PC (F/g) | PC (%) | Specific energy (Wh/kg) | Specific power (W/kg) |
|-----------------------|----------------------------|--------------------|------------------|------------|----------|--------|-------------------------|-----------------------|
| 150                   | 201.9                      | 0.258              | 3.4              | 150.0      | 51.9     | 25.7   | 15.5                    | 55725                 |
| 100                   | 213.6                      | 0.252              | 5.0              | 160.0      | 53.6     | 25.1   | 16.6                    | 37448                 |
| 70                    | 222.6                      | 0.246              | 7.0              | 168.0      | 54.6     | 24.5   | 17.6                    | 26410                 |
| 60                    | 222.4                      | 0.226              | 7.6              | 172.0      | 50.4     | 22.7   | 18.5                    | 23191                 |
| 50                    | 226.9                      | 0.206              | 8.2              | 180.0      | 46.9     | 20.7   | 19.8                    | 19837                 |
| 30                    | 227.8                      | 0.200              | 13.4             | 182.0      | 45.8     | 20.1   | 20.2                    | 11987                 |
| 20                    | 234.6                      | 0.198              | 19.9             | 188.0      | 46.6     | 19.9   | 20.9                    | 8014                  |
| 10                    | 250.6                      | 0.194              | 38.8             | 202.0      | 48.6     | 19.4   | 22.6                    | 4030                  |
| 5                     | 268.9                      | 0.192              | 77.2             | 217.0      | 51.9     | 19.3   | 24.3                    | 2018                  |
| 3                     | 282.7                      | 0.192              | 127.6            | 228.6      | 54.1     | 19.1   | 25.7                    | 1213                  |
| 2                     | 295.9                      | 0.192              | 192.5            | 238.9      | 57.0     | 19.3   | 26.8                    | 807                   |
| 1                     | 321.7                      | 0.200              | 398.7            | 257.6      | 64.1     | 19.9   | 28.6                    | 400                   |
| 0.5                   | 371.9                      | 0.216              | 864.0            | 291.6      | 80.3     | 21.6   | 31.8                    | 196                   |
| 0.3                   | 445.0                      | 0.242              | 1607.8           | 337.6      | 107.4    | 24.1   | 35.6                    | 114                   |
| 0.2                   | 555.6                      | 0.276              | 2774.4           | 402.0      | 153.6    | 27.6   | 40.4                    | 72                    |

**Table S14.** The specific energy and specific power values of reported carbon samples in KOH aqueous electrolytes with 3E system.

| Sample         | Electrolyte | Potential window (V) | $E_{\max}$ (Wh/kg) | $E_{\min}$ (Wh/kg) | $P_{\max}$ (W/kg) | Reference |
|----------------|-------------|----------------------|--------------------|--------------------|-------------------|-----------|
| 3D-HPCFs       | 6 M KOH     | 1.1                  | 63.7               | 18.7               | 11000             | 7a        |
| DWNT           | 6 M KOH     | 1.0                  | 12.1               | 10.0               | 7200              | 7b        |
| ACN            | 6 M KOH     | 1.0                  | 63.2               | 47.5               | 34200             |           |
| BP-800         | 6 M KOH     | 1.0                  | ~41.7              | ~6.9               | 5000              | 7c        |
| YP17D          | 6 M KOH     | 1.0                  | ~29.9              | 17.6               | 31750             | 7d        |
| a-CBP          | 6 M KOH     | 1.0                  | 41.1               | 30.7               | 55250             |           |
| CS15A6         | 6 M KOH     | 0.9                  | 25.1               | 18.2               | 3645              | 7e        |
| PGC-1          | 6 M KOH     | 1.0                  | 16.4               | 13.2               | 9500              | 7f        |
| APC            | 6 M KOH     | 1.0                  | 32.1               | 19.3               | 6950              | 7g        |
| ACA-500/500-K1 | 30 % KOH    | 1.0                  | 34.0               | 27.9               | 10050             | 7h        |
| RGO            | 1 M KOH     | 1.1                  | 33.8               | 28.9               | 94655             | 7i        |
| N-RGO          | 1 M KOH     | 1.1                  | 30.6               | 25.8               | 84590             |           |
| MDC-700-1KOH   | 6 M KOH     | 1.0                  | 14.4               | 10.0               | 19980             | This work |
| MDC-700-2KOH   | 6 M KOH     | 1.0                  | 30.8               | 26.8               | 80423             | This work |



**Table S15.** The specific energy and specific power values of reported carbon samples in H<sub>2</sub>SO<sub>4</sub> aqueous electrolytes with 3E system.

| Sample                    | Electrolyte                          | Potential window (V) | E <sub>max</sub> (Wh/kg) | E <sub>min</sub> (Wh/kg) | P <sub>max</sub> (W/kg) | Reference |
|---------------------------|--------------------------------------|----------------------|--------------------------|--------------------------|-------------------------|-----------|
| CNC700                    | 1 M H <sub>2</sub> SO <sub>4</sub>   | 1.0                  | 32.5                     | 23.6                     | 8500                    | 8a        |
| Activated carbon          | 0.5 M H <sub>2</sub> SO <sub>4</sub> | 1.0                  | ~20.6                    | ~17.5                    | ~6300                   | 8b        |
| Z-900                     | 0.5 M H <sub>2</sub> SO <sub>4</sub> | 1.2                  | 42.8                     | 23.0                     | 6900                    | 8c        |
| NPC-800                   | 1 M H <sub>2</sub> SO <sub>4</sub>   | 0.8                  | 21.2                     | 15.2                     | 13680                   | 8d        |
| PCF-4                     | 1 M H <sub>2</sub> SO <sub>4</sub>   | 0.8                  | 37.4                     | 18.6                     | 14725                   | 8e        |
| N-doped carbon nanosheets | 0.5 M H <sub>2</sub> SO <sub>4</sub> | 1.0                  | 14.2                     | ~11.3                    | ~40800                  | 8f        |
| NPC                       | 1 M H <sub>2</sub> SO <sub>4</sub>   | 0.9                  | 28.4                     | 14.1                     | 56250                   | 8g        |
| RGO                       | 1 M H <sub>2</sub> SO <sub>4</sub>   | 1.1                  | 31.9                     | 26.1                     | 85525                   | 7h        |
| N-RGO                     | 1 M H <sub>2</sub> SO <sub>4</sub>   | 1.1                  | 36.6                     | 26.4                     | 86350                   |           |
| MDC-700-1KOH              | 1 M H <sub>2</sub> SO <sub>4</sub>   | 1.0                  | 26.0                     | 15.4                     | 43855                   | This work |
| MDC-700-2KOH              | 1 M H <sub>2</sub> SO <sub>4</sub>   | 1.0                  | 40.4                     | 15.5                     | 55735                   | This work |

**Table S16.** The estimated electrochemical parameters from capacitance versus frequency plots and the fitted values from Nyquist plots using the equivalent circuits for various carbon samples in 6 M KOH aqueous electrolyte with 3E system.

| Parameters                   | MDC-700                 |                         | MDC-700-1KOH            |                         | MDC-700-2KOH            |                         |
|------------------------------|-------------------------|-------------------------|-------------------------|-------------------------|-------------------------|-------------------------|
|                              | Before 1000 cycles      | After 1000 cycles       | Before 30000 cycles     | After 30000 cycles      | Before 30000 cycles     | After 30000 cycles      |
| Maximum C at 0.01 Hz (F/g)   | 46.6                    | 55.5                    | 108.7                   | 102.9                   | 244.4                   | 240.4                   |
| Operating frequency (Hz)     | 0.04948                 | 0.05995                 | 3.831                   | 3.831                   | 1.896                   | 1.896                   |
| Relaxation time constant (s) | 20.2102                 | 16.6806                 | 0.2610                  | 0.2610                  | 0.5274                  | 0.5274                  |
| R1 ( $\Omega$ )              | 10.99                   | 10.72                   | 4.669                   | 4.809                   | 4.178                   | 4.116                   |
| C1 (F/g)                     | 88.8                    | 58.6                    | 0.651                   | 0.740                   | 1.05                    | 1.01                    |
| R2 ( $\Omega$ )              | 152.8                   | 24.7                    | 0.32320                 | 0.29855                 | 0.42333                 | 0.51322                 |
| C2 (F/g)                     | 19.3                    | 16.7                    | 305.1                   | 285.6                   | 701.6                   | 1004.9                  |
| R3 ( $\Omega$ )              | 32.93                   | 8.607                   | 1.296                   | 1.654                   | 1.346                   | 1.968                   |
| W1-R ( $\Omega$ )            | 9.791                   | 13.25                   | 2.198                   | 2.166                   | 3.797                   | 4.058                   |
| WI-T (s)                     | $6.4502 \times 10^{-4}$ | $1.5398 \times 10^{-3}$ | $8.6671 \times 10^{-3}$ | $8.2970 \times 10^{-3}$ | $4.2942 \times 10^{-2}$ | $4.1384 \times 10^{-2}$ |
| WI-P                         | 0.31396                 | 0.32020                 | 0.47781                 | 0.47928                 | 0.49307                 | 0.48533                 |

**Table S17.** The estimated values from capacitance versus frequency plots and the fitted values from Nyquist plots using the equivalent circuit for MDC-700-1KOH and MDC-700-2KOH in 1 M Na<sub>2</sub>SO<sub>4</sub> aqueous electrolyte with 3E system.

| Parameters                   | MDC-700-1KOH            | MDC-700-2KOH            |                         |
|------------------------------|-------------------------|-------------------------|-------------------------|
|                              |                         | Before 30000 cycles     | After 30000 cycles      |
| Maximum C at 0.01 Hz (F/g)   | 23.9                    | 153.6                   | 120.0                   |
| Operating frequency (Hz)     | 0.3162                  | 0.8254                  | 1                       |
| Relaxation time constant (s) | 3.1626                  | 1.2115                  | 1                       |
| R1 (Ω)                       | 15.53                   | 16.54                   | 16.77                   |
| C1 (F/g)                     | 0.612                   | 0.430                   | 0.399                   |
| R2 (Ω)                       | 8.196                   | 0.93023                 | 1.141                   |
| C2 (F/g)                     | 125.6                   | 171.5                   | 182.0                   |
| R3 (Ω)                       | 2003                    | 5.144                   | 9804                    |
| W1-R (Ω)                     | 316.5                   | 7.749                   | 26.2                    |
| W1-T (s)                     | 2.0678×10 <sup>-1</sup> | 5.5714×10 <sup>-2</sup> | 3.7108×10 <sup>-1</sup> |
| W1-P                         | 0.40611                 | 0.49418                 | 0.47513                 |

**Table S18.** The estimated values from capacitance versus frequency plots and the fitted values from Nyquist plots using the equivalent circuits for MDC-700-1KOH and MDC-700-2KOH in 1 M H<sub>2</sub>SO<sub>4</sub> aqueous electrolyte with 3E system.

| Parameters                   | MDC-700-1KOH            |                         | MDC-700-2KOH            |                         |
|------------------------------|-------------------------|-------------------------|-------------------------|-------------------------|
|                              | Before 30000 cycles     | After 30000 cycles      | Before 30000 cycles     | After 30000 cycles      |
| Maximum C at 0.01 Hz (F/g)   | 134.7                   | 140.6                   | 229.4                   | 238.2                   |
| Operating frequency (Hz)     | 1.668                   | 1.778                   | 0.7263                  | 0.7743                  |
| Relaxation time constant (s) | 0.5995                  | 0.5624                  | 1.3768                  | 1.2915                  |
| R1 (Ω)                       | 10.1                    | 8.674                   | 9.114                   | 9.661                   |
| C1 (F/g)                     | 155.2                   | 1.60                    | 0.249                   | 1.55                    |
| R2 (Ω)                       | 1.224                   | 0.30731                 | 0.65612                 | 0.87502                 |
| C2 (F/g)                     | 448.0                   | 171.7                   | 2.68                    | 1000.4                  |
| R3 (Ω)                       | 1.334                   | 2.016                   | 0.7565                  | 3.707                   |
| W1-R (Ω)                     | 2.211                   | 3.046                   | 14.06                   | 10.12                   |
| WI-T (s)                     | 1.2168×10 <sup>-2</sup> | 1.8073×10 <sup>-2</sup> | 1.1735×10 <sup>-1</sup> | 9.7112×10 <sup>-2</sup> |
| WI-P                         | 0.48549                 | 0.48724                 | 0.46639                 | 0.47779                 |

**Table S19.** The electrochemical recycling performances of the reported carbon samples in 6 M KOH aqueous electrolyte with 3E system.

| Sample           | Potential window (V) | Recycling condition (A/g) | Initial C <sub>s</sub> (F/g) | Cycle number | Retention (%) | Reference |
|------------------|----------------------|---------------------------|------------------------------|--------------|---------------|-----------|
| HPCFA            | 1.0                  | 10                        | 144.2                        | 10000        | 95.0          | 9a        |
| N-OMCS           | 1.0                  | 20                        | ~200.0                       | 25000        | 100.0         | 9b        |
| NHCSF-0          | 1.0                  | 4                         | ~200.0                       | 20000        | 89.9          | 9c        |
| NHCSF-3          | 1.0                  | 4                         | ~250.0                       | 20000        | 92.1          |           |
| NMCS-8           | 1.0                  | 10                        | ~200.0                       | 10000        | 96.0          | 9d        |
| KBM-700          | 0.8                  | 10                        | ~175                         | 10000        | 97.0          | 9e        |
| carbon-Zn-Mg-900 | 1.0                  | 20                        | 162.9                        | 10000        | 96.6          | 9f        |
| MDC-700-1KOH     | 1.0                  | 50                        | 118.7                        | 30000        | 96.5          | This work |
| MDC-700-2KOH     | 1.0                  | 20                        | 282.5                        | 30000        | 97.2          | This work |

**Table S20.** The electrochemical recycling performances of the reported carbon samples in 1 M H<sub>2</sub>SO<sub>4</sub> aqueous electrolyte with 3E system.

| Sample       | Potential window (V) | Recycling condition (A/g) | Initial C <sub>s</sub> (F/g) | Cycle number | Retention (%) | Reference |
|--------------|----------------------|---------------------------|------------------------------|--------------|---------------|-----------|
| CA-C-1       | 1.0                  | 1                         | ~275.0                       | 5000         | 97.0          | 10a       |
| ZIF-8-NPC    | 1.0                  | 1                         | 201.0                        | 5000         | 97.7          | 10b       |
| NPCF         | 1.0                  | 1                         | 332.0                        | 5000         | 98.9          |           |
| CS3-6A       | 0.8                  | 10                        | ~280.0                       | 8000         | 98.0          | 10c       |
| N-OMC        | 0.8                  | 2                         | 156.0                        | 10000        | 107.5         | 10d       |
| GA-MC        | 0.8                  | 2                         | 168.0                        | 5000         | 141.7         | 10e       |
| N-OMCNFA     | 0.8                  | 3                         | ~240.0                       | 10000        | ~100.0        | 10f       |
| MDC-700-1KOH | 1.0                  | 50                        | 142.0                        | 30000        | 105.6         | This work |
| MDC-700-2KOH | 1.0                  | 20                        | 237.3                        | 30000        | 105.0         | This work |

**Table S21.** The electrochemical parameters of MDC-700-2KOH calculated from GCD curves in 1 M KOH electrolyte with Swagelok cell-based 2E system.

| Current density (A/g) | Specific capacitance (F/g) | Potential drop (V) | ESR ( $\Omega$ ) | EDLC (F/g) | PC (F/g) | PC (%) | Specific energy (Wh/kg) | Specific power (W/kg) |
|-----------------------|----------------------------|--------------------|------------------|------------|----------|--------|-------------------------|-----------------------|
| 16.4                  | 157.3                      | 0.196              | 3.9              | 131.6      | 25.7     | 16.3   | 5.5                     | 8256                  |
| 9.87                  | 158.9                      | 0.157              | 5.2              | 138.2      | 20.7     | 13.0   | 6.0                     | 5148                  |
| 4.93                  | 164.9                      | 0.099              | 6.6              | 151.3      | 13.6     | 8.2    | 6.9                     | 2717                  |
| 3.95                  | 169.3                      | 0.093              | 7.8              | 156.1      | 13.2     | 7.8    | 7.2                     | 2184                  |
| 2.96                  | 169.5                      | 0.082              | 9.1              | 157.9      | 11.6     | 6.8    | 7.4                     | 1655                  |
| 1.97                  | 172.5                      | 0.074              | 12.3             | 161.8      | 10.74    | 6.2    | 7.6                     | 1111                  |
| 0.987                 | 176.2                      | 0.061              | 20.2             | 167.3      | 8.9      | 5.1    | 7.9                     | 562                   |
| 0.493                 | 180.5                      | 0.057              | 38.0             | 171.9      | 8.6      | 4.8    | 8.2                     | 282                   |
| 0.329                 | 183.2                      | 0.057              | 57.1             | 174.5      | 8.7      | 4.7    | 8.3                     | 188                   |
| 0.197                 | 188.5                      | 0.060              | 100.5            | 179.1      | 9.4      | 5.0    | 8.5                     | 113                   |

**Table S22.** The electrochemical parameters of MDC-700-2KOH calculated from GCD curves in 1 M Na<sub>2</sub>SO<sub>4</sub> electrolyte with Swagelok cell-based 2E system.

| Current density (A/g) | Specific capacitance (F/g) | Potential drop (V) | ESR ( $\Omega$ ) | EDLC (F/g) | PC (F/g) | PC (%) | Specific energy (Wh/kg) | Specific power (W/kg) |
|-----------------------|----------------------------|--------------------|------------------|------------|----------|--------|-------------------------|-----------------------|
| 14.3                  | 69.5                       | 0.450              | 11.2             | 50.5       | 19.0     | 27.3   | 3.2                     | 8216                  |
| 10.7                  | 76.0                       | 0.360              | 12.0             | 58.9       | 17.1     | 22.5   | 4.1                     | 6642                  |
| 5.36                  | 88.3                       | 0.290              | 19.3             | 72.3       | 16.0     | 18.1   | 5.3                     | 3510                  |
| 4.29                  | 90.6                       | 0.276              | 23.0             | 75.0       | 15.6     | 17.2   | 5.5                     | 2838                  |
| 3.21                  | 91.9                       | 0.257              | 28.6             | 77.1       | 14.8     | 16.1   | 5.8                     | 2158                  |
| 2.14                  | 94.7                       | 0.212              | 35.3             | 82.1       | 12.6     | 13.3   | 6.3                     | 1488                  |
| 1.07                  | 101.6                      | 0.171              | 55.3             | 90.5       | 11.1     | 10.9   | 7.2                     | 763                   |
| 0.536                 | 111.6                      | 0.175              | 116.9            | 99.4       | 12.2     | 10.9   | 7.9                     | 382                   |
| 0.357                 | 120.2                      | 0.191              | 190.7            | 105.8      | 14.4     | 12.0   | 8.3                     | 252                   |
| 0.214                 | 138.2                      | 0.236              | 392.9            | 117.8      | 20.4     | 14.8   | 8.9                     | 146                   |

**Table S23.** The specific energy and specific power values of the reported carbon samples in KOH aqueous electrolytes with 2E system.

| Sample       | Electrolyte | Potential window (V) | $E_{\max}$ (Wh/kg) | $E_{\min}$ (Wh/kg) | $P_{\max}$ (W/kg) | Reference |
|--------------|-------------|----------------------|--------------------|--------------------|-------------------|-----------|
| N-CNFs-900   | 6 M KOH     | 1.0                  | 7.1                | 5.4                | 15000             | 11a       |
| Carbon       | 6 M KOH     | 1.6                  | 7.1                | ~4.4               | ~4000             | 11b       |
| Maxsorb      | 30 wt% KOH  | 0.9                  | 9.4                | 2.1                | 410               | 11c       |
| OMC-1        |             | 0.9                  | 6.0                | 3.9                | 789               |           |
| OMC-2        |             | 0.9                  | 5.3                | 4.7                | 932               |           |
| OMC-3        |             | 0.9                  | 8.0                | 5.1                | 1019              |           |
| MC-A         | 6 M KOH     | 1.0                  | 7.2                | ~6.4               | ~2300             | 11d       |
| MPC-A        |             | 1.0                  | 6.8                | ~5.8               | ~2100             |           |
| MAC-A        |             | 1.0                  | 9.4                | ~6.1               | ~2200             |           |
| KPAC-800     | 6 M KOH     | 1.0                  | 8.2                | 4.7                | 13000             | 11e       |
| APC          | 6 M KOH     | 1.4                  | 18.4               | 11.4               | 6881              | 7g        |
| NNPC-800     | 6 M KOH     | 1.0                  | 5.4                | ~3.0               | ~1000             | 11f       |
| HPCNC-700-a  | 6 M KOH     | 1.0                  | 9.7                | ~6.3               | 4200              | 11g       |
| MAC-2-700    | 6 M KOH     | 1.0                  | 8.5                | 5.0                | 12080             | 11h       |
| MDC-700-2KOH | 1 M KOH     | 1.2                  | 8.5                | 5.5                | 8256              | This work |



**Table S24.** The electrochemical recycling performances of the reported carbon samples in KOH aqueous electrolytes with 2E system.

| Sample        | Potential window (V) | Recycling condition (A/g) | Initial $C_s$ (F/g) | Cycle number | Retention (%) | Reference |
|---------------|----------------------|---------------------------|---------------------|--------------|---------------|-----------|
| CNCs-800      | 1.0                  | 2                         | ~240                | 5000         | 95.0          | 12a       |
| LN750         | 1.2                  | 1                         | 168                 | 5000         | 89.0          | 12b       |
|               | 1.4                  | 1                         | 163                 | 5000         | 86.0          |           |
| APC           | 1.4                  | 0.5                       | 270                 | 5000         | 91.1          | 7g        |
| HPCNC-700-a   | 1.0                  | 5                         | ~270                | 5000         | 85.0          | 11g       |
| HCN-900-10H5R | 1.0                  | 1                         | 180                 | 5000         | ~91.7         | 12c       |
| MDC-700-2KOH  | 1.2                  | 4.93                      | 166.1               | 5000         | 89.8          | This work |

**Table S25.** The estimated values from capacitance versus frequency plots and the fitted values from Nyquist plots using the equivalent circuit for MDC-700-2KOH in different electrolytes with Swagelok cell-based 2E system.

| Sample                       | 1 M KOH            |                   | 1 M Na <sub>2</sub> SO <sub>4</sub> |                   |
|------------------------------|--------------------|-------------------|-------------------------------------|-------------------|
|                              | Before 5000 cycles | After 5000 cycles | Before 3000 cycles                  | After 3000 cycles |
| Maximum C at 0.01 Hz (F/g)   | 174.3              | 145.5             | 67.8                                | 61.0              |
| Operating frequency (Hz)     | 0.3831             | 0.4948            | 0.3371                              | 0.2966            |
| Relaxation time constant (s) | 2.610              | 2.021             | 2.966                               | 3.372             |
| R1 ( $\Omega$ )              | 0.56754            | 0.55994           | 1.313                               | 1.429             |
| CPE1-T (F/g)                 | 29.1               | 26.8              | 34.0                                | 46.8              |
| CPE-P                        | 0.95987            | 0.96962           | 0.90082                             | 0.86086           |
| R2 ( $\Omega$ )              | 2.058              | 1.783             | 4.846                               | 6.266             |
| W1-R ( $\Omega$ )            | 1.098              | 0.93314           | 5.353                               | 5.448             |
| W1-T (s)                     | 0.1212             | 0.084987          | 0.1859                              | 0.16061           |
| W1-P                         | 0.47967            | 0.47984           | 0.45990                             | 0.45622           |



**Table S26.** The electrochemical parameters of MDC-700-2KOH calculated from GCD curves in 2 M H<sub>2</sub>SO<sub>4</sub> electrolyte with Ti plate-based 2E system.

| Current density (A/g) | Specific capacitance (F/g) | Potential drop (V) | ESR ( $\Omega$ ) | EDLC (F/g) | PC (F/g) | PC (%) | Specific energy (Wh/kg) | Specific power (W/kg) |
|-----------------------|----------------------------|--------------------|------------------|------------|----------|--------|-------------------------|-----------------------|
| 15                    | 115.2                      | 0.271              | 7.1              | 84.0       | 31.2     | 27.1   | 2.1                     | 5468                  |
| 10                    | 128.7                      | 0.254              | 11.7             | 96.0       | 32.7     | 25.4   | 2.5                     | 3730                  |
| 7                     | 140.3                      | 0.242              | 15.7             | 106.4      | 33.9     | 24.2   | 2.8                     | 2654                  |
| 5                     | 151.8                      | 0.218              | 20.2             | 118.7      | 33.1     | 21.8   | 3.2                     | 1955                  |
| 4                     | 157.1                      | 0.213              | 24.6             | 123.7      | 33.4     | 21.3   | 3.4                     | 1575                  |
| 3                     | 167.1                      | 0.201              | 31.0             | 133.6      | 33.5     | 20.0   | 3.7                     | 1199                  |
| 2                     | 179.1                      | 0.184              | 42.6             | 146.1      | 33.0     | 18.4   | 4.1                     | 816                   |
| 1                     | 203.4                      | 0.174              | 80.6             | 168.0      | 35.4     | 17.4   | 4.8                     | 413                   |
| 0.5                   | 236.6                      | 0.191              | 176.7            | 191.5      | 45.1     | 19.1   | 5.4                     | 202                   |
| 0.3                   | 283.0                      | 0.229              | 353.9            | 218.1      | 64.9     | 22.9   | 5.8                     | 116                   |
| 0.2                   | 369.2                      | 0.301              | 697.1            | 257.9      | 111.3    | 30.1   | 6.3                     | 70                    |

**Table S27.** The electrochemical parameters of MDC-700-2KOH calculated from GCD curves in 2 M H<sub>2</sub>SO<sub>4</sub> electrolyte with ITO glass-based 2E system.

| Current density (A/g) | Specific capacitance (F/g) | Potential drop (V) | ESR ( $\Omega$ ) | EDLC (F/g) | PC (F/g) | PC (%) | Specific energy (Wh/kg) | Specific power (W/kg) |
|-----------------------|----------------------------|--------------------|------------------|------------|----------|--------|-------------------------|-----------------------|
| 4                     | 56.9                       | 0.662              | 55.9             | 19.2       | 37.7     | 66.3   | 0.2                     | 675                   |
| 3                     | 93.0                       | 0.587              | 66.1             | 38.4       | 54.6     | 58.7   | 0.6                     | 619                   |
| 2                     | 113.0                      | 0.448              | 75.6             | 62.4       | 50.6     | 44.8   | 1.2                     | 552                   |
| 1                     | 138.6                      | 0.296              | 99.9             | 97.6       | 41.0     | 29.6   | 2.4                     | 352                   |
| 0.5                   | 173.4                      | 0.252              | 170.3            | 130.0      | 43.4     | 25.0   | 3.4                     | 187                   |
| 0.3                   | 225.2                      | 0.280              | 315.6            | 162.1      | 63.1     | 28.0   | 4.1                     | 108                   |
| 0.2                   | 379.8                      | 0.396              | 669.0            | 228.9      | 150.9    | 39.7   | 4.8                     | 60                    |



**Table S28.** The specific energy and specific power values of the reported MOF-derived carbon samples in H<sub>2</sub>SO<sub>4</sub> aqueous electrolytes with 2E system.

| Sample              | Electrolyte                        | Potential window (V) | E <sub>max</sub> (Wh/kg) | E <sub>min</sub> (Wh/kg) | P <sub>max</sub> (W/kg) | Reference |
|---------------------|------------------------------------|----------------------|--------------------------|--------------------------|-------------------------|-----------|
| CIRMOF-3-950        | 1 M H <sub>2</sub> SO <sub>4</sub> | 1.0                  | 8.3                      | 5.8                      | 2075                    | 13a       |
| NPC <sub>1000</sub> | 1 M H <sub>2</sub> SO <sub>4</sub> | 1.0                  | 4.2                      | 3.8                      | 688                     | 13b       |
| A-ZC-800            | 1 M H <sub>2</sub> SO <sub>4</sub> | 1.0                  | 5.9                      | 4.9                      | 1763                    | 13c       |
| AS-ZC-800           |                                    |                      | 7.4                      | 6.5                      | 9350                    |           |
| NCPPs               | 1 M H <sub>2</sub> SO <sub>4</sub> | 1.0                  | 6.6                      | ~2.0                     | ~1400                   | 13d       |
| HPCNFs-N            | 2 M H <sub>2</sub> SO <sub>4</sub> | 1.0                  | 11.0                     | 6.7                      | 25000                   | 13e       |
| NPC                 | 1 M H <sub>2</sub> SO <sub>4</sub> | 1.0                  | 10.8                     | 5.5                      | 994                     | 13f       |
| C800                | 1 M H <sub>2</sub> SO <sub>4</sub> | 1.0                  | 6.5                      | 5.6                      | 1000                    | 13g       |
| MPC                 | 1 M H <sub>2</sub> SO <sub>4</sub> | 1.0                  | 3.8                      | 2.5                      | 3550                    | 13h       |
| CNRod               |                                    |                      | 5.7                      | 4.0                      | 5800                    |           |
| GNRib               |                                    |                      | 6.7                      | 4.3                      | 6150                    |           |
| MDC-700-2KOH        | 2 M H <sub>2</sub> SO <sub>4</sub> | 1.0                  | 6.3                      | 2.1                      | 5468                    | This work |

**Table S29.** The electrochemical recycling performances of reported carbon samples in H<sub>2</sub>SO<sub>4</sub> aqueous electrolyte with 2E system under the identical potential window and cycle number.

| Sample              | Potential window (V) | Recycling condition (A/g) | Initial C <sub>s</sub> (F/g) | Cycle number | Retention (%) | Reference |
|---------------------|----------------------|---------------------------|------------------------------|--------------|---------------|-----------|
| SSG Film            | 1.0                  | 108                       | ~180                         | 10000        | 97.0          | 14a       |
| 3D-porous RGO films | 1.0                  | 25                        | ~230                         | 10000        | 97.6          | 14b       |
| RGO films           |                      | 25                        | ~125                         |              | 86.2          |           |
| LN750               | 1.0                  | 1                         | ~180                         | 10000        | 83.3          | 12b       |
| SSC-1               | 1.0                  | 5                         | ~150                         | 10000        | 72.0          | 14c       |
| MDC-700-2KOH        | 1.0                  | 3                         | 172.1                        | 10000        | 78.5          | This work |
| MDC-700-2KOH        | 1.0                  | 2                         | 133.9                        | 10000        | 101.0         | This work |

**Table S30.** The estimated values from capacitance versus frequency plots and the fitted values from Nyquist plots using the equivalent circuit for MDC-700-2KOH in 2 M H<sub>2</sub>SO<sub>4</sub> electrolyte with Ti plate-based and ITO glass-based 2E systems.

| Sample                       | Ti plate current collector |                    | ITO glass current collector |                    |
|------------------------------|----------------------------|--------------------|-----------------------------|--------------------|
|                              | Before 10000 cycles        | After 10000 cycles | Before 10000 cycles         | After 10000 cycles |
| Maximum C at 0.01 Hz (F/g)   | 134.7                      | 119.1              | 116.1                       | 117.1              |
| Operating frequency (Hz)     | 0.2448                     | 0.1565             | 0.04948                     | 0.04642            |
| Relaxation time constant (s) | 4.085                      | 6.390              | 20.210                      | 21.542             |
| R1 (Ω)                       | 0.31784                    | 0.25351            | 24.42                       | 26.37              |
| CPE1-T (F/g)                 | 16.5                       | 25.0               | 48.2                        | 50.2               |
| CPE-P                        | 0.95015                    | 0.98007            | 0.70500                     | 0.66119            |
| R2 (Ω)                       | 3.559                      | 4.020              | 10.16                       | 8.317              |
| W1-R (Ω)                     | 1.820                      | 6.464              | 86.35                       | 89.62              |
| W1-T (s)                     | 0.076298                   | 0.29098            | 64.06                       | 70.74              |
| W1-P                         | 0.32409                    | 0.26324            | 0.69452                     | 0.69200            |
| C1 (F/g)                     | 180.7                      | 149.8              | 153.4                       | 154.8              |

## References

- [1] J. Gao, X. Wang, Y. Zhang, J. Liu, Q. Lu, M. Liu, *Electrochim. Acta*, **2016**, *207*, 266-274.
- [2] a) Y. F. Nie, Q. Wang, X. Y. Chen, Z. J. Zhang, *J. Power Sources*, **2016**, *320*, 140-152; b) Y. Zhang, X. Cui, L. Zu, X. Cai, Y. Liu, X. Wang, H. Lian, *Materials*, **2016**, *9*, 734-746; c) L.-Q. Mai, A. Minhas-Khan, X. Tian, K. M. Hercule, Y.-L. Zhao, X. Lin, X. Xu, *Nat. Commun.*, **2013**, *4*, 2923-2929.
- [3] a) J.-W. Lang, X.-B. Yan, X.-Y. Yuan, J. Yang, Q.-J. Xue, *J. Power Sources*, **2011**, *196*, 10472-10478; b) G. Xu, C. Zheng, Q. Zhang, J. Huang, M. Zhao, J. Nie, X. Wang, F. Wei, *Nano Res.*, **2011**, *4*, 870-881.
- [4] J. Lee, P. Srimuk, S. Fleischmann, X. Su, T. Alan Hatton, V. Presser, *Prog. Mater. Sci.*, **2019**, *101*, 46-89.
- [5] J. Chmiola, G. Yushin, R. Dash, Y. Gogotsi, *J. Power Sources*, **2006**, *158*, 765-772.
- [6] J. Zhang, J. Jiang, H. Li, X. S. Zhao, *Energy Environ. Sci.*, **2011**, *4*, 4009-4015.
- [7] a) B. You, J. Jiang, S. Fan, *ACS Appl. Mater. Interfaces*, **2014**, *6*, 15302-15308; b) Z. Fan, J. Yan, T. Wei, L. Zhi, G. Ning, T. Li, F. Wei, *Adv. Funct. Mater.*, **2011**, *21*, 2366-2375; c) H. Zhu, J. Yin, X. Wang, H. Wang, X. Yang, *Adv. Funct. Mater.*, **2013**, *23*, 1305-1312; d) C. Long, D. Qi, T. Wei, J. Yan, L. Jiang, Z. Fan, *Adv. Funct. Mater.*, **2014**, *24*, 3953-3961; e) K. Xia, Q. Gao, J. Jiang, J. Hu, *Carbon*, **2008**, *46*, 1718-1726; f) Z. Wang, X. Zhang, X. Liu, M. Lv, K. Yang, J. Meng, *Carbon*, **2011**, *49*, 161-169; g) Z.-X. Li, B.-L. Yang, K.-Y. Zou, L. Kong, M.-L. Yue, H.-H. Duan, *Carbon*, **2019**, *144*, 540-548; h) J. Wang, X. Yang, D. Wu, R. Fu, M. S. Dresselhaus, G. Dresselhaus, *J. Power Sources*, **2008**, *185*, 589-594; i) Y.-H. Lee, K.-H. Chang, C.-C. Hu, *J. Power Sources*, **2013**, *227*, 300-308.
- [8] a) K. Xie, X. Qin, X. Wang, Y. Wang, H. Tao, Q. Wu, L. Yang, Z. Hu, *Adv. Mater.*, **2012**, *24*, 347-352; b) S. Isikli, M. Lecea, M. Ribagorda, M. C. Carreño, R. Díaz, *Carbon*, **2014**, *66*, 654-661; c) W. Chaikittisilp, M. Hu, H. Wang, H.-S. Huang, T. Fujita, K. C.-W. Wu, L.-C. Chen, Y. Yamauchi, K. Ariga, *Chem. Commun.*, **2012**, *48*, 7259-7261; d) N. L. Torad, R. R. Salunkhe, Y. Li, H. Hamoudi, M. Imura, Y. Sakka, C.-C. Hu, Y. Yamauchi, *Chem. Eur. J.*, **2014**, *20*, 7895-7900; e) Z. Zhang, Z. Zhou, H. Peng, Y. Qin, G. Li, *Electrochim. Acta*, **2014**, *134*, 471-477; f) G. Hasegawa, M. Aoki, K. Kanamori, K. Nakanishi, T. Hanada,



K. Tadanaga, *J. Mater. Chem.*, **2011**, *21*, 2060-2063; g) R. R. Salunkhe, Y. Kamachi, N. L. Torad, S. M. Hwang, Z. Sun, S. X. Dou, J. H. Kim, Y. Yamauchi, *J. Mater. Chem. A*, **2014**, *2*, 19848-19854.

[9] a) Y. Liu, G. Li, Y. Guo, Y. Ying, X. Peng, *ACS Appl. Mater. Interfaces*, **2017**, *9*, 14043-14050; b) J.-G. Wang, H. Liu, H. Sun, W. Hua, H. Wang, X. Liu, B. Wei, *Carbon*, **2018**, *127*, 85-91; c) Z. Li, H. Mi, L. Liu, Z. Bai, J. Zhang, Q. Zhang, J. Qiu, *Carbon*, **2018**, *136*, 176-186; d) Y.-N. Hou, Z. Zhao, Z. Yu, S. Zhang, S. Li, J. Yang, H. Zhang, C. Liu, Z. Wang, J. Qiu, *Chem. Eur. J.*, **2018**, *24*, 2681-2686; e) Y. Pan, Y. Zhao, S. Mu, Y. Wang, C. Jiang, Q. Liu, Q. Fang, M. Xue, S. Qiu, *J. Mater. Chem. A*, **2017**, *5*, 9544-9552; f) Z. J. Zhang, D. H. Xie, P. Cui, X. Y. Chen, *RSC Adv.*, **2014**, *4*, 6664-6671.

[10] a) M. Zhou, F. Pu, Z. Wang, S. Guan, *Carbon*, **2014**, *68*, 185-194; b) C. Wang, C. Liu, J. Li, X. Sun, J. Shen, W. Han, L. Wang, *Chem. Commun.*, **2017**, *53*, 1751-1754; c) N. P. Wickramaratne, J. Xu, M. Wang, L. Zhu, L. Dai, M. Jaroniec, *Chem. Mater.*, **2014**, *26*, 2820-2828; d) H. Chen, M. Zhou, Z. Wang, S. Zhao, S. Guan, *Electrochim. Acta*, **2014**, *148*, 187-194; e) Z.-S. Wu, Y. Sun, Y.-Z. Tan, S. Yang, X. Feng, K. Müllen, *J. Am. Chem. Soc.*, **2012**, *134*, 19532-19535; f) D.-D. Zhou, W.-Y. Li, X.-L. Dong, Y.-G. Wang, C.-X. Wang, Y.-Y. Xia, *J. Mater. Chem. A*, **2013**, *1*, 8488-8496.

[11] a) L.-F. Chen, X.-D. Zhang, H.-W. Liang, M. Kong, Q.-F. Guan, P. Chen, Z.-Y. Wu, S.-H. Yu, *ACS Nano*, **2012**, *6*, 7092-7102; b) R. R. Salunkhe, J. Tang, Y. Kamachi, T. Nakato, J. H. Kim, Y. Yamauchi, *ACS Nano*, **2015**, *9*, 6288-6296; c) W. Xing, S. Z. Qiao, R. G. Ding, F. Li, G. Q. Lu, Z. F. Yan, H. M. Cheng, *Carbon*, **2006**, *44*, 216-224; d) J. Hu, H. Wang, Q. Gao, H. Guo, *Carbon*, **2010**, *48*, 3599-3606; e) P. Cheng, S. Gao, P. Zang, X. Yang, Y. Bai, H. Xu, Z. Liu, Z. Lei, *Carbon*, **2015**, *93*, 315-324; f) J. Zou, P. Liu, L. Huang, Q. Zhang, T. Lan, S. Zeng, X. Zeng, L. Yu, S. Liu, H. Wu, W. Tu, Y. Yao, *Electrochim. Acta*, **2018**, *271*, 599-607; g) J. Shao, M. Song, G. Wu, Y. Zhou, J. Wan, X. Ren, F. Ma, *Energy Storage Mater.*, **2018**, *13*, 57-65; h) D. Zhang, C. He, J. Zhao, J. Wang, K. Li, *J. Colloid Interf. Sci.*, **2019**, *546*, 101-112.

[12] a) Y. Tan, C. Xu, G. Chen, Z. Liu, M. Ma, Q. Xie, N. Zheng, S. Yao, *ACS Appl. Mater. Interfaces*, **2013**, *5*, 2241-2248; b) M. P. Bichat, E. Raymundo-Piñero, F. Béguin, *Carbon*, **2010**, *48*, 4351-4361; c) F. Xu, Z. Tang, S. Huang, L. Chen, Y. Liang, W. Mai, H. Zhong, R. Fu, D. Wu, *Nat. Commun.*, **2015**, *6*, 7221-7230.

- [13] a) J.-W. Jeon, R. Sharma, P. Meduri, B. W. Arey, H. T. Schaefer, J. L. Lutkenhaus, J. P. Lemmon, P. K. Thallapally, M. I. Nandasiri, B. P. McGrail, S. K. Nune, *ACS Appl. Mater. Interfaces*, **2014**, *6*, 7214-7222; b) B. Liu, H. Shioyama, H. Jiang, X. Zhang, Q. Xu, *Carbon*, **2010**, *48*, 456-463; c) A. J. Amali, J.-K. Sun, Q. Xu, *Chem. Commun.*, **2014**, *50*, 1519-1522; d) L. Kong, Q. Chen, X. Shen, Z. Xu, C. Xu, Z. Ji, J. Zhu, *Electrochim. Acta*, **2018**, *265*, 651-661; e) L.-F. Chen, Y. Lu, L. Yu, X. W. Lou, *Energy Environ. Sci.*, **2017**, *10*, 1777-1783; f) B. Liu, H. Shioyama, T. Akita, Q. Xu, *J. Am. Chem. Soc.*, **2008**, *130*, 5390-5391; g) H.-L. Jiang, B. Liu, Y.-Q. Lan, K. Kuratani, T. Akita, H. Shioyama, F. Zong, Q. Xu, *J. Am. Chem. Soc.*, **2011**, *133*, 11854-11857; h) P. Pachfule, D. Shinde, M. Majumder, Q. Xu, *Nat. Chem.*, **2016**, *8*, 718-723.
- [14] a) X. Yang, J. Zhu, L. Qiu, D. Li, *Adv. Mater.*, **2011**, *23*, 2833-2838; b) Y. Shao, M. F. El-Kady, C.-W. Lin, G. Zhu, K. L. Marsh, J. Y. Hwang, Q. Zhang, Y. Li, H. Wang, R. B. Kaner, *Adv. Mater.*, **2016**, *28*, 6719-6726; c) T. E. Rufford, D. Hulicova-Jurcakova, K. Khosla, Z. Zhu, G. Q. Lu, *J. Power Sources*, **2010**, *195*, 912-918.
